# Supplementary material for: Transcriptional profiling of coaggregation interactions between Streptococcus gordonii and Veillonella parvula by Dual RNA-Seq
Source: PubMed Central journal article supplement (PMC6529473; doi:10.1038/s41598-019-43979-w), 2019-05-21
Supplement: 41598_2019_43979_MOESM1_ESM.pdf [file 41598_2019_43979_MOESM1_ESM.pdf]

**Supplementary Information for:**

Transcriptional profiling of coaggregation interactions between *Streptococcus gordonii* and *Veillonella parvula* by Dual RNA-Seq

Naresh V.R. Mutha, Waleed K. Mohammed, Natalio Krasnogor, Geok Y. A. Tan, Wei Yee Wee, Yongming Li, Siew Woh Choo and Nicholas S. Jakubovics

**Contents:**

|             |            |
|-------------|------------|
| 1.....      | Cover page |
| 2. ....     | Table S1   |
| 3-24. ....  | Table S2   |
| 25-28. .... | Table S3   |
| 29-30. .... | Table S4   |
| 31. ....    | Figure S1  |
| 32. ....    | Figure S2  |
| 33. ....    | Figure S3  |
| 34. ....    | Reference  |

**Table S1.** Mapping statistics for assignment of transcripts to species.

| <b>Sample</b>                                       | <b>Raw Reads</b> | <b>Cleaned Reads</b> | <b>Reads Mapped</b> | <b>Mapped Reads (% of Total)</b> |
|-----------------------------------------------------|------------------|----------------------|---------------------|----------------------------------|
| <i>S. gordonii</i>                                  | 41,753,430       | 41,530,718           | 40,180,884          | 96%                              |
| <i>V. parvula</i>                                   | 41,514,350       | 41,292,644           | 32,368,845          | 78%                              |
| Mixed sample mapped to <i>S. gordonii</i> (SgVp_Sg) | 42,898,870       | 42,669,156           | 18,568,775          | 43%                              |
| Mixed sample mapped to <i>V. parvula</i> (SgVp_Vp)  | 42,898,870       | 42,669,156           | 14,056,794          | 32%                              |

**Table S2.** Genes regulated in *V. parvula* following coaggregation with *S. gordonii* ( $P < 0.05$ ).

| GeneSymbol (NCBI) | StringDB_locus tags | Gene description                                   | Log <sub>2</sub> FoldChange <sup>a</sup> | P value | P <sub>adj</sub> <sup>b</sup> | GO terms                                                                                                                                                                                                                      |
|-------------------|---------------------|----------------------------------------------------|------------------------------------------|---------|-------------------------------|-------------------------------------------------------------------------------------------------------------------------------------------------------------------------------------------------------------------------------|
| HSIVP1_RS05385    | Vpar_1131           | cobalt chelatase                                   | -9.49                                    | 0.00    | 0.00                          | metal ion binding [GO:0046872]; sirohdrochlorin cobaltochelataase activity [GO:0016852]; anaerobic cobalamin biosynthetic process [GO:0019251]                                                                                |
| HSIVP1_RS09425    | Vpar_0321           | nitroreductase                                     | -6.78                                    | 0.00    | 0.00                          | oxidoreductase activity [GO:0016491]                                                                                                                                                                                          |
| HSIVP1_RS07000    | --                  | NA                                                 | -7.13                                    | 0.00    | 0.00                          | integral component of membrane [GO:0016021]; isomerase activity [GO:0016853]                                                                                                                                                  |
| HSIVP1_RS04385    | birA                | repressor                                          | -6.64                                    | 0.00    | 0.00                          | DNA binding [GO:0003677]; serine-type endopeptidase activity [GO:0004252]; DNA repair [GO:0006281]; DNA replication [GO:0006260]; negative regulation of transcription, DNA-templated [GO:0045892]; SOS response [GO:0009432] |
| HSIVP1_RS00990    | --                  | C4-dicarboxylate ABC transporter                   | -5.23                                    | 0.00    | 0.00                          | integral component of membrane [GO:0016021]; C4-dicarboxylate transmembrane transporter activity [GO:0015556]                                                                                                                 |
| HSIVP1_RS00195    | Vpar_0077           | fad dependent oxidoreductase                       | -6.56                                    | 0.00    | 0.00                          | FAD binding [GO:0071949]; oxidoreductase activity [GO:0016491]                                                                                                                                                                |
| HSIVP1_RS05180    | --                  | sugar-binding protein                              | -5.02                                    | 0.00    | 0.00                          | carbohydrate binding [GO:0030246]                                                                                                                                                                                             |
| HSIVP1_RS01615    | menB                | naphthoate synthase                                | -4.79                                    | 0.00    | 0.00                          | 1,4-dihydroxy-2-naphthoyl-CoA synthase activity [GO:0008935]; menaquinone biosynthetic process [GO:0009234]                                                                                                                   |
| HSIVP1_RS05950    | --                  | conserved domain protein                           | -5.83                                    | 0.00    | 0.00                          | integral component of membrane [GO:0016021]                                                                                                                                                                                   |
| HSIVP1_RS03580    | Vpar_0002           | dna polymerase i                                   | -9.28                                    | 0.00    | 0.00                          | DNA binding [GO:0003677]; DNA-directed DNA polymerase activity [GO:0003887]; nuclease activity [GO:0004518]; DNA repair [GO:0006281]; DNA-dependent DNA replication [GO:0006261]                                              |
| HSIVP1_RS05335    | rpsH                | binding domain protein                             | -4.31                                    | 0.00    | 0.00                          | cofactor binding [GO:0048037]                                                                                                                                                                                                 |
| HSIVP1_RS02070    | --                  | peptidase propeptide and ypeb domain protein       | -4.25                                    | 0.00    | 0.00                          | 0                                                                                                                                                                                                                             |
| HSIVP1_RS02075    | --                  | dihydrolipoamide dehydrogenase                     | -4.54                                    | 0.00    | 0.00                          | cell [GO:0005623]; dihydrolipoyl dehydrogenase activity [GO:0004148]; electron transfer activity [GO:0009055]; flavin adenine dinucleotide binding [GO:0050660]; cell redox homeostasis [GO:0045454]                          |
| HSIVP1_RS09010    | Vpar_1722           | superoxide dismutase                               | -11.29                                   | 0.00    | 0.00                          | metal ion binding [GO:0046872]; superoxide dismutase activity [GO:0004784]                                                                                                                                                    |
| HSIVP1_RS01075    | --                  | autonomous glycyl radical cofactor                 | -4.18                                    | 0.00    | 0.00                          | formate C-acetyltransferase activity [GO:0008861]; lyase activity [GO:0016829]                                                                                                                                                |
| HSIVP1_RS01885    | --                  | late embryogenesis abundant protein                | -4.09                                    | 0.00    | 0.00                          | 0                                                                                                                                                                                                                             |
| HSIVP1_RS00835    | --                  | family domain protein                              | -4.26                                    | 0.00    | 0.00                          | 0                                                                                                                                                                                                                             |
| HSIVP1_RS02420    | --                  | lipid a biosynthesis 2- -lipid iva acyltransferase | -4.32                                    | 0.00    | 0.00                          | #N/A                                                                                                                                                                                                                          |
| HSIVP1_RS07925    | aroC                | chorismate synthase                                | -7.81                                    | 0.00    | 0.00                          | #N/A                                                                                                                                                                                                                          |
| HSIVP1_RS02560    | Vpar_1828           | atpase                                             | -4.31                                    | 0.00    | 0.00                          | #N/A                                                                                                                                                                                                                          |
| HSIVP1_RS00600    | Vpar_0145           | natural resistance-associated macrophage protein   | -4.28                                    | 0.00    | 0.00                          | integral component of membrane [GO:0016021]; plasma membrane [GO:0005886]; metal ion transmembrane transporter activity [GO:0046873]                                                                                          |
| HSIVP1_RS08175    | sepF                | hypothetical protein                               | -5.12                                    | 0.00    | 0.00                          | 0                                                                                                                                                                                                                             |
| HSIVP1_RS09185    | --                  | pf12889 family protein                             | -4.66                                    | 0.00    | 0.00                          | 0                                                                                                                                                                                                                             |

| GeneSymbol (NCBI) | StringDB_locus tags | Gene description                             | Log <sub>2</sub> FoldChange <sup>a</sup> | P value | P <sub>adj</sub> <sup>b</sup> | GO terms                                                                                                                                                                                                                                                                                                                                  |
|-------------------|---------------------|----------------------------------------------|------------------------------------------|---------|-------------------------------|-------------------------------------------------------------------------------------------------------------------------------------------------------------------------------------------------------------------------------------------------------------------------------------------------------------------------------------------|
| HSIVP1_RS01255    | glmM                | phosphoglucosamine mutase                    | -4.44                                    | 0.00    | 0.00                          | magnesium ion binding [GO:0000287]; phosphoglucosamine mutase activity [GO:0008966]; carbohydrate metabolic process [GO:0005975]                                                                                                                                                                                                          |
| HSIVP1_RS05425    | cobD                | cobalamin biosynthesis protein               | -6.16                                    | 0.00    | 0.00                          | cobalamin biosynthetic process [GO:0009236]                                                                                                                                                                                                                                                                                               |
| HSIVP1_RS04860    | --                  | sufd domain protein                          | -4.41                                    | 0.00    | 0.00                          | iron-sulfur cluster assembly [GO:0016226]                                                                                                                                                                                                                                                                                                 |
| HSIVP1_RS07880    | Vpar_1857           | membrane protein                             | -5.92                                    | 0.00    | 0.00                          | integral component of membrane [GO:0016021]                                                                                                                                                                                                                                                                                               |
| HSIVP1_RS01385    | --                  | nad h-dependent oxidoreductase               | -3.84                                    | 0.00    | 0.00                          | 6,7-dihydropteridine reductase activity [GO:0004155]                                                                                                                                                                                                                                                                                      |
| HSIVP1_RS05955    | --                  | glutaconyl- decarboxylase subunit beta       | -3.52                                    | 0.00    | 0.00                          | integral component of membrane [GO:0016021]; plasma membrane [GO:0005886]; glutaconyl-CoA decarboxylase activity [GO:0018801]; sodium ion transport [GO:0006814]                                                                                                                                                                          |
| HSIVP1_RS07510    | sepF                | hypothetical protein                         | -3.44                                    | 0.00    | 0.00                          | 0                                                                                                                                                                                                                                                                                                                                         |
| HSIVP1_RS01940    | speD                | s-adenosylmethionine decarboxylase proenzyme | -4.16                                    | 0.00    | 0.00                          | #N/A                                                                                                                                                                                                                                                                                                                                      |
| HSIVP1_RS08035    | Vpar_1637           | glutamate synthase                           | -4.92                                    | 0.00    | 0.00                          | glutamate synthase (NADPH) activity [GO:0004355]; glutamate biosynthetic process [GO:0006537]                                                                                                                                                                                                                                             |
| HSIVP1_RS06885    | --                  | uroporphyrinogen-iii c-methyltransferase     | -5.40                                    | 0.00    | 0.00                          | NAD binding [GO:0051287]; precorrin-2 dehydrogenase activity [GO:0043115]; sirohydrochlorin ferrochelatae activity [GO:0051266]; uroporphyrin-III C-methyltransferase activity [GO:0004851]; uroporphyrinogen-III synthase activity [GO:0004852]; cobalamin biosynthetic process [GO:0009236]; siroheme biosynthetic process [GO:0019354] |
| HSIVP1_RS06315    | --                  | glutaredoxin                                 | -4.03                                    | 0.00    | 0.00                          | 0                                                                                                                                                                                                                                                                                                                                         |
| HSIVP1_RS00020    | --                  | m48 family                                   | -4.88                                    | 0.00    | 0.00                          | metalloendopeptidase activity [GO:0004222]                                                                                                                                                                                                                                                                                                |
| HSIVP1_RS02135    | Vpar_0478           | cytochrome d ubiquinol subunit ii            | -4.59                                    | 0.00    | 0.00                          | integral component of membrane [GO:0016021]; oxidoreductase activity [GO:0016491]                                                                                                                                                                                                                                                         |
| HSIVP1_RS08910    | --                  | heterodisulfide reductase subunit b          | -9.71                                    | 0.00    | 0.00                          | 0                                                                                                                                                                                                                                                                                                                                         |
| HSIVP1_RS07685    | argG                | argininosuccinate synthase                   | -3.52                                    | 0.00    | 0.00                          | cytoplasm [GO:0005737]; argininosuccinate synthase activity [GO:0004055]; ATP binding [GO:0005524]; arginine biosynthetic process [GO:0006526]                                                                                                                                                                                            |
| HSIVP1_RS01170    | Vpar_0278           | I- type ii                                   | -4.41                                    | 0.00    | 0.00                          | asparaginase activity [GO:0004067]; asparagine metabolic process [GO:0006528]                                                                                                                                                                                                                                                             |
| HSIVP1_RS09140    | --                  | caax amino protease                          | -5.18                                    | 0.00    | 0.00                          | integral component of membrane [GO:0016021]                                                                                                                                                                                                                                                                                               |
| HSIVP1_RS07575    | --                  | pf05167 family                               | -4.66                                    | 0.00    | 0.00                          | 0                                                                                                                                                                                                                                                                                                                                         |
| HSIVP1_RS07535    | atpH                | atp synthase delta subunit                   | -3.45                                    | 0.00    | 0.00                          | plasma membrane [GO:0005886]; proton-transporting ATP synthase complex, catalytic core F(1) [GO:0045261]; proton-transporting ATP synthase activity, rotational mechanism [GO:0046933]; ATP synthesis coupled proton transport [GO:0015986]                                                                                               |
| HSIVP1_RS04625    | Vpar_1857           | membrane protein                             | -6.06                                    | 0.00    | 0.00                          | integral component of membrane [GO:0016021]                                                                                                                                                                                                                                                                                               |
| HSIVP1_RS05410    | Vpar_1139           | precorrin-8x methylmutase                    | -5.05                                    | 0.00    | 0.00                          | precorrin-8X methylmutase activity [GO:0016993]; cobalamin biosynthetic process [GO:0009236]                                                                                                                                                                                                                                              |
| HSIVP1_RS01750    | pyrF                | orotidine 5'-phosphate decarboxylase         | -4.56                                    | 0.00    | 0.00                          | orotidine-5'-phosphate decarboxylase activity [GO:0004590]; 'de novo' pyrimidine nucleobase biosynthetic process [GO:0006207]; 'de novo' UMP biosynthetic process [GO:0044205]                                                                                                                                                            |
| HSIVP1_RS06330    | Vpar_0835           | methyltransferase                            | -5.66                                    | 0.00    | 0.00                          | 0                                                                                                                                                                                                                                                                                                                                         |
| HSIVP1_RS09435    | whiA                | sporulation protein                          | -3.13                                    | 0.00    | 0.00                          | 0                                                                                                                                                                                                                                                                                                                                         |

| GeneSymbol (NCBI) | StringDB_locus tags | Gene description                                    | Log <sub>2</sub> FoldChange <sup>a</sup> | P value | P <sub>adj</sub> <sup>b</sup> | GO terms                                                                                                                                                                                           |
|-------------------|---------------------|-----------------------------------------------------|------------------------------------------|---------|-------------------------------|----------------------------------------------------------------------------------------------------------------------------------------------------------------------------------------------------|
| HSIVP1_RS07585    | --                  | phosphoglucomutase                                  | -3.33                                    | 0.00    | 0.00                          | magnesium ion binding [GO:0000287]; phosphoglucomutase activity [GO:0004614]; carbohydrate metabolic process [GO:0005975]                                                                          |
| HSIVP1_RS07820    | Vpar_1594           | molybdopterin oxidoreductase                        | -3.76                                    | 0.00    | 0.00                          | electron transfer activity [GO:0009055]; iron-sulfur cluster binding [GO:0051536]; metal ion binding [GO:0046872]; molybdopterin cofactor binding [GO:0043546]                                     |
| HSIVP1_RS00960    | Vpar_0076           | transcriptional family                              | -4.89                                    | 0.00    | 0.00                          | DNA binding [GO:0003677]; DNA-binding transcription factor activity [GO:0003700]; transcription, DNA-templated [GO:0006351]                                                                        |
| HSIVP1_RS04395    | --                  | site-specific phage integrase family                | -4.00                                    | 0.00    | 0.00                          | DNA binding [GO:0003677]; DNA integration [GO:0015074]; DNA recombination [GO:0006310]                                                                                                             |
| HSIVP1_RS03615    | Vpar_1500           | ribosomal protein l7ae                              | -6.26                                    | 0.00    | 0.00                          | ribosome [GO:0005840]; RNA binding [GO:0003723]                                                                                                                                                    |
| HSIVP1_RS02525    | Vpar_0554           | signal peptidase i                                  | -3.25                                    | 0.00    | 0.00                          | integral component of membrane [GO:0016021]; serine-type peptidase activity [GO:0008236]                                                                                                           |
| HSIVP1_RS00595    | sepF                | hypothetical protein                                | -4.20                                    | 0.00    | 0.00                          | 0                                                                                                                                                                                                  |
| HSIVP1_RS04795    | gltX                | glutamate--trna ligase                              | -3.05                                    | 0.00    | 0.00                          | cytoplasm [GO:0005737]; ATP binding [GO:0005524]; glutamate-tRNA ligase activity [GO:0004818]; tRNA binding [GO:0000049]; zinc ion binding [GO:0008270]; glutamyl-tRNA aminoacylation [GO:0006424] |
| HSIVP1_RS01485    | sepF                | hypothetical protein                                | -3.09                                    | 0.00    | 0.00                          | integral component of membrane [GO:0016021]                                                                                                                                                        |
| HSIVP1_RS03190    | Vpar_0685           | capsular polysaccharide biosynthesis protein        | -3.33                                    | 0.00    | 0.00                          | manganese ion binding [GO:0030145]; protein tyrosine phosphatase activity [GO:0004725]                                                                                                             |
| HSIVP1_RS09420    | --                  | cro cl family transcriptional regulator             | -2.84                                    | 0.00    | 0.00                          | 0                                                                                                                                                                                                  |
| HSIVP1_RS07790    | --                  | peptidyl-prolyl cis-trans cyclophilin-type          | -4.80                                    | 0.00    | 0.00                          | peptidyl-prolyl cis-trans isomerase activity [GO:0003755]; protein folding [GO:0006457]                                                                                                            |
| HSIVP1_RS04995    | --                  | 4-oxalocrotonate tautomerase family enzyme          | -3.48                                    | 0.00    | 0.00                          | isomerase activity [GO:0016853]; cellular aromatic compound metabolic process [GO:0006725]                                                                                                         |
| HSIVP1_RS05620    | --                  | pf06135 family protein                              | -2.83                                    | 0.00    | 0.00                          | 0                                                                                                                                                                                                  |
| HSIVP1_RS00590    | sepF                | hypothetical protein                                | -3.43                                    | 0.00    | 0.00                          | #N/A                                                                                                                                                                                               |
| HSIVP1_RS08995    | --                  | glutamate synthase homotetrameric                   | -2.86                                    | 0.00    | 0.00                          | glutamate synthase (NADPH) activity [GO:0004355]; iron-sulfur cluster binding [GO:0051536]                                                                                                         |
| HSIVP1_RS07345    | --                  | 50s ribosomal protein l7 l12                        | -2.70                                    | 0.00    | 0.00                          | ribosome [GO:0005840]; structural constituent of ribosome [GO:0003735]; translation [GO:0006412]                                                                                                   |
| HSIVP1_RS07610    | Vpar_1550           | glutamate dehydrogenase                             | -5.72                                    | 0.00    | 0.00                          | oxidoreductase activity, acting on the CH-NH2 group of donors, NAD or NADP as acceptor [GO:0016639]; cellular amino acid metabolic process [GO:0006520]                                            |
| HSIVP1_RS01330    | --                  | molybdate abc transporter substrate-binding protein | -4.01                                    | 0.00    | 0.00                          | metal ion binding [GO:0046872]; molybdate ion transport [GO:0015689]                                                                                                                               |
| HSIVP1_RS01560    | --                  | LktC                                                | -3.31                                    | 0.00    | 0.00                          | 0                                                                                                                                                                                                  |
| HSIVP1_RS04690    | --                  | aspartyl glutamyl-trna(asn gln) b subunit           | -2.98                                    | 0.00    | 0.00                          | ATP binding [GO:0005524]; glutamyl-tRNA synthase (glutamine-hydrolyzing) activity [GO:0050567]; transferase activity [GO:0016740]; translation [GO:0006412]                                        |
| HSIVP1_RS08135    | --                  | fumarate class ii                                   | -4.65                                    | 0.00    | 0.00                          | tricarboxylic acid cycle enzyme complex [GO:0045239]; fumarate hydratase activity [GO:0004333]; fumarate metabolic process [GO:0006106]; tricarboxylic acid cycle [GO:0006099]                     |

| GeneSymbol (NCBI) | StringDB_locus tags | Gene description                         | Log <sub>2</sub> FoldChange <sup>a</sup> | P value | P <sub>adj</sub> <sup>b</sup> | GO terms                                                                                                                                                                                                                                                                                                                                                                                                                                                                             |
|-------------------|---------------------|------------------------------------------|------------------------------------------|---------|-------------------------------|--------------------------------------------------------------------------------------------------------------------------------------------------------------------------------------------------------------------------------------------------------------------------------------------------------------------------------------------------------------------------------------------------------------------------------------------------------------------------------------|
| HSIVP1_RS03885    | gpsA                | glycerol-3-phosphate dehydrogenase       | 2.88                                     | 0.00    | 0.00                          | glycerol-3-phosphate dehydrogenase complex [GO:0009331]; glycerol-3-phosphate dehydrogenase [NAD(P)+] activity [GO:0047952]; glycerol-3-phosphate dehydrogenase [NAD+] activity [GO:0004367]; NAD binding [GO:0051287]; carbohydrate metabolic process [GO:0005975]; glycerol-3-phosphate biosynthetic process [GO:0046167]; glycerol-3-phosphate catabolic process [GO:0046168]; glycerophospholipid metabolic process [GO:0006650]; phospholipid biosynthetic process [GO:0008654] |
| HSIVP1_RS03640    | Vpar_0790           | riboflavin biosynthesis protein          | -3.88                                    | 0.00    | 0.00                          | ATP binding [GO:0005524]; FMN adenyltransferase activity [GO:0003919]; riboflavin kinase activity [GO:0008531]; FAD biosynthetic process [GO:0006747]; FMN biosynthetic process [GO:0009398]; riboflavin biosynthetic process [GO:0009231]                                                                                                                                                                                                                                           |
| HSIVP1_RS02820    | tmk                 | thymidylate kinase                       | -6.21                                    | 0.00    | 0.00                          | thymidylate kinase activity [GO:0004798]                                                                                                                                                                                                                                                                                                                                                                                                                                             |
| HSIVP1_RS02130    | Vpar_0478           | cytochrome d ubiquinol oxidase subunit i | -2.56                                    | 0.00    | 0.00                          | cytochrome complex [GO:0070069]; integral component of membrane [GO:0016021]; electron transfer activity [GO:0009055]; aerobic electron transport chain [GO:0019646]                                                                                                                                                                                                                                                                                                                 |
| HSIVP1_RS00970    | Vpar_1293           | AraC family transcriptional regulator    | -3.57                                    | 0.00    | 0.00                          | #N/A                                                                                                                                                                                                                                                                                                                                                                                                                                                                                 |
| HSIVP1_RS09760    | Vpar_0979           | hemagglutinin                            | -3.80                                    | 0.00    | 0.00                          | #N/A                                                                                                                                                                                                                                                                                                                                                                                                                                                                                 |
| HSIVP1_RS05665    | Vpar_1121           | thioredoxin                              | -4.34                                    | 0.00    | 0.00                          | cell [GO:0005623]; protein disulfide oxidoreductase activity [GO:0015035]; cell redox homeostasis [GO:0045454]; glycerol ether metabolic process [GO:0006662]                                                                                                                                                                                                                                                                                                                        |
| HSIVP1_RS02500    | --                  | abc transporter atp-binding protein      | -3.69                                    | 0.00    | 0.00                          | ATP-binding cassette (ABC) transporter complex [GO:0043190]; ATP binding [GO:0005524]; ATPase activity [GO:0016887]; transmembrane transport [GO:0055085]                                                                                                                                                                                                                                                                                                                            |
| HSIVP1_RS04480    | --                  | pyruvate dehydrogenase                   | -2.51                                    | 0.00    | 0.00                          | magnesium ion binding [GO:0000287]; pyruvate dehydrogenase (quinone) activity [GO:0052737]; thiamine pyrophosphate binding [GO:0030976]                                                                                                                                                                                                                                                                                                                                              |
| HSIVP1_RS09230    | Vpar_1772           | lactaldehyde reductase                   | -4.59                                    | 0.00    | 0.00                          | lactaldehyde reductase activity [GO:0008912]; metal ion binding [GO:0046872]                                                                                                                                                                                                                                                                                                                                                                                                         |
| HSIVP1_RS01565    | purE                | phosphoribosylaminoimidazole carboxylase | -3.48                                    | 0.00    | 0.00                          | 5-(carboxyamino)imidazole ribonucleotide mutase activity [GO:0034023]; lyase activity [GO:0016829]; 'de novo' IMP biosynthetic process [GO:0006189]                                                                                                                                                                                                                                                                                                                                  |
| HSIVP1_RS03510    | --                  | aminopeptidase i zinc metalloprotease    | -2.63                                    | 0.00    | 0.00                          | aminopeptidase activity [GO:0004177]; metalloprotease activity [GO:0008237]; zinc ion binding [GO:0008270]                                                                                                                                                                                                                                                                                                                                                                           |
| HSIVP1_RS01900    | murl                | glutamate racemase                       | -3.09                                    | 0.00    | 0.00                          | glutamate racemase activity [GO:0008881]; cell wall organization [GO:0071555]; peptidoglycan biosynthetic process [GO:0009252]; regulation of cell shape [GO:0008360]                                                                                                                                                                                                                                                                                                                |
| HSIVP1_RS01630    | --                  | operon protein 2                         | -5.11                                    | 0.00    | 0.00                          | 0                                                                                                                                                                                                                                                                                                                                                                                                                                                                                    |
| HSIVP1_RS02535    | Vpar_0041           | s-layer domain protein                   | -4.01                                    | 0.00    | 0.00                          | 0                                                                                                                                                                                                                                                                                                                                                                                                                                                                                    |
| HSIVP1_RS06160    | Vpar_1282           | threonine synthase                       | -2.51                                    | 0.00    | 0.00                          | #N/A                                                                                                                                                                                                                                                                                                                                                                                                                                                                                 |
| HSIVP1_RS00825    | --                  | manganese transporter                    | -2.46                                    | 0.00    | 0.00                          | metal ion binding [GO:0046872]; cell adhesion [GO:0007155]; metal ion transport [GO:0030001]                                                                                                                                                                                                                                                                                                                                                                                         |

| GeneSymbol (NCBI) | StringDB_locus tags | Gene description                 | Log <sub>2</sub> FoldChange <sup>a</sup> | P value | P <sub>adj</sub> <sup>b</sup> | GO terms                                                                                                                                                                                                                                          |
|-------------------|---------------------|----------------------------------|------------------------------------------|---------|-------------------------------|---------------------------------------------------------------------------------------------------------------------------------------------------------------------------------------------------------------------------------------------------|
| HSIVP1_RS05450    | --                  | pf04461 family protein           | -4.65                                    | 0.00    | 0.00                          | 0                                                                                                                                                                                                                                                 |
| HSIVP1_RS01250    | Vpar_0077           | fad dependent oxidoreductase     | -2.72                                    | 0.00    | 0.00                          | 0                                                                                                                                                                                                                                                 |
| HSIVP1_RS02475    | Vpar_1094           | sugar family                     | 2.81                                     | 0.00    | 0.00                          | arabinose-5-phosphate isomerase activity [GO:0019146]; carbohydrate derivative binding [GO:0097367]; metal ion binding [GO:0046872]; carbohydrate derivative metabolic process [GO:1901135]; carbohydrate metabolic process [GO:0005975]          |
| HSIVP1_RS03075    | Vpar_1464           | abc transporter                  | -3.44                                    | 0.00    | 0.00                          | cytoplasm [GO:0005737]; ATP binding [GO:0005524]; DNA binding [GO:0003677]; valine-tRNA ligase activity [GO:0004832]; valyl-tRNA aminoacylation [GO:0006438]                                                                                      |
| HSIVP1_RS00965    | --                  | lysine transporter LysE          | -3.44                                    | 0.00    | 0.00                          | integral component of membrane [GO:0016021]; plasma membrane [GO:0005886]; amino acid transport [GO:0006865]                                                                                                                                      |
| HSIVP1_RS00630    | Vpar_1857           | membrane protein                 | -5.29                                    | 0.00    | 0.00                          | integral component of membrane [GO:0016021]                                                                                                                                                                                                       |
| HSIVP1_RS05350    | --                  | conserved domain protein         | -2.69                                    | 0.00    | 0.00                          | 0                                                                                                                                                                                                                                                 |
| HSIVP1_RS06350    | --                  | pf10670 domain protein           | -2.48                                    | 0.00    | 0.00                          | 0                                                                                                                                                                                                                                                 |
| HSIVP1_RS01965    | --                  | hep hag repeat protein           | -4.04                                    | 0.00    | 0.00                          | #N/A                                                                                                                                                                                                                                              |
| HSIVP1_RS01105    | Vpar_1857           | membrane protein                 | -4.53                                    | 0.00    | 0.00                          | integral component of membrane [GO:0016021]                                                                                                                                                                                                       |
| HSIVP1_RS09535    | Vpar_0003           | s4 domain protein                | -3.77                                    | 0.00    | 0.00                          | RNA binding [GO:0003723]                                                                                                                                                                                                                          |
| HSIVP1_RS09735    | --                  | conserved domain protein         | -4.33                                    | 0.00    | 0.00                          | 0                                                                                                                                                                                                                                                 |
| HSIVP1_RS06495    | Vpar_1464           | abc transporter                  | -3.11                                    | 0.00    | 0.00                          | integral component of membrane [GO:0016021]; plasma membrane [GO:0005886]; transporter activity [GO:0005215]                                                                                                                                      |
| HSIVP1_RS03460    | Vpar_0752           | pyruvate carboxylase             | -2.33                                    | 0.00    | 0.00                          | ATP binding [GO:0005524]; biotin binding [GO:0009374]; metal ion binding [GO:0046872]; pyruvate carboxylase activity [GO:0004736]; transferase activity [GO:0016740]; gluconeogenesis [GO:0006094]; pyruvate metabolic process [GO:0006090]       |
| HSIVP1_RS03890    | Vpar_0714           | rna methyltransferase            | 2.43                                     | 0.00    | 0.00                          | methyltransferase activity [GO:0008168]; nucleic acid binding [GO:0003676]; rRNA methylation [GO:0031167]                                                                                                                                         |
| HSIVP1_RS06745    | --                  | WYL domain-containing protein    | -2.95                                    | 0.00    | 0.00                          | 0                                                                                                                                                                                                                                                 |
| HSIVP1_RS09020    | Vpar_1724           | phosphatidylglycerophosphatase a | -6.14                                    | 0.00    | 0.00                          | phosphatidylglycerophosphatase activity [GO:0008962]; lipid metabolic process [GO:0006629]                                                                                                                                                        |
| HSIVP1_RS03445    | Vpar_0960           | nucleotide-binding protein       | -2.31                                    | 0.00    | 0.00                          | ATP binding [GO:0005524]; ATPase activity [GO:0016887]; iron-sulfur cluster binding [GO:0051536]; metal ion binding [GO:0046872]                                                                                                                  |
| HSIVP1_RS02330    | --                  | fructose-6-phosphate aldolase    | -3.25                                    | 0.00    | 0.00                          | cytoplasm [GO:0005737]; aldehyde-lyase activity [GO:0016832]; sedoheptulose-7-phosphate:D-glyceraldehyde-3-phosphate glycerontransferase activity [GO:0004801]; carbohydrate metabolic process [GO:0005975]; pentose-phosphate shunt [GO:0006098] |
| HSIVP1_RS00910    | --                  | major facilitator family protein | -4.94                                    | 0.00    | 0.00                          | integral component of membrane [GO:0016021]; transmembrane transport [GO:0055085]                                                                                                                                                                 |
| HSIVP1_RS05740    | queE                | radical sam protein              | 2.33                                     | 0.00    | 0.00                          | 4 iron, 4 sulfur cluster binding [GO:0051539]; iron ion binding [GO:0005506]; oxidoreductase activity [GO:0016491]                                                                                                                                |

| GeneSymbol (NCBI) | StringDB_locus tags | Gene description                                                      | Log <sub>2</sub> FoldChange <sup>a</sup> | P value | P <sub>adj</sub> <sup>b</sup> | GO terms                                                                                                                                                                                                                                                                        |
|-------------------|---------------------|-----------------------------------------------------------------------|------------------------------------------|---------|-------------------------------|---------------------------------------------------------------------------------------------------------------------------------------------------------------------------------------------------------------------------------------------------------------------------------|
| HSIVP1_RS05660    | --                  | uptake hydrogenase small subunit                                      | -2.23                                    | 0.00    | 0.00                          | ferredoxin hydrogenase complex [GO:0009375]; 3 iron, 4 sulfur cluster binding [GO:0051538]; 4 iron, 4 sulfur cluster binding [GO:0051539]; ferredoxin hydrogenase activity [GO:0008901]; hydrogenase (acceptor) activity [GO:0033748]; metal ion binding [GO:0046872]           |
| HSIVP1_RS05835    | rplM                | ribosomal protein                                                     | -2.23                                    | 0.00    | 0.00                          | ribosome [GO:0005840]                                                                                                                                                                                                                                                           |
| HSIVP1_RS08955    | Vpar_0690           | dioxygenase                                                           | -3.73                                    | 0.00    | 0.00                          | ferrous iron binding [GO:0008198]; oxidoreductase activity, acting on single donors with incorporation of molecular oxygen [GO:0016701]; zinc ion binding [GO:0008270]; cellular aromatic compound metabolic process [GO:0006725]                                               |
| HSIVP1_RS03880    | --                  | acyl-phosphate glycerol 3-phosphate acyltransferase                   | 2.38                                     | 0.00    | 0.00                          | integral component of membrane [GO:0016021]; plasma membrane [GO:0005886]; acyl-phosphate glycerol-3-phosphate acyltransferase activity [GO:0043772]; phospholipid biosynthetic process [GO:0008654]                                                                            |
| HSIVP1_RS09745    | --                  | hep hag repeat protein                                                | -3.05                                    | 0.00    | 0.00                          | outer membrane [GO:0019867]; pathogenesis [GO:0009405]                                                                                                                                                                                                                          |
| HSIVP1_RS00680    | trpB                | tryptophan beta subunit                                               | -4.56                                    | 0.00    | 0.00                          | tryptophan synthase activity [GO:0004834]                                                                                                                                                                                                                                       |
| HSIVP1_RS05785    | Vpar_1212           | ppgpp synthetase                                                      | 2.25                                     | 0.00    | 0.00                          | GTP diphosphokinase activity [GO:0008728]; kinase activity [GO:0016301]; guanosine tetraphosphate metabolic process [GO:0015969]                                                                                                                                                |
| HSIVP1_RS01610    | --                  | 2-succinyl-6-hydroxy- $\gamma$ -cyclohexadiene-1-carboxylate synthase | -5.21                                    | 0.00    | 0.00                          | 2-succinyl-6-hydroxy-2,4-cyclohexadiene-1-carboxylate synthase activity [GO:0070205]; menaquinone biosynthetic process [GO:0009234]                                                                                                                                             |
| HSIVP1_RS02125    | Vpar_0076           | transcriptional regulator                                             | -2.16                                    | 0.00    | 0.00                          | DNA binding [GO:0003677]                                                                                                                                                                                                                                                        |
| HSIVP1_RS07895    | --                  | ribonucleoside-diphosphate beta subunit                               | -3.95                                    | 0.00    | 0.00                          | metal ion binding [GO:0046872]; ribonucleoside-diphosphate reductase activity, thioredoxin disulfide as acceptor [GO:0004748]; deoxyribonucleotide biosynthetic process [GO:0009263]; DNA replication [GO:0006260]                                                              |
| HSIVP1_RS04540    | --                  | trna:m u-54 methyltransferase                                         | 2.36                                     | 0.00    | 0.00                          | cytoplasm [GO:0005737]; 5,10-methylenetetrahydrofolate-dependent tRNA (m5U54) methyltransferase activity [GO:0030698]; flavin adenine dinucleotide binding [GO:0050660]; methylenetetrahydrofolate-tRNA-(uracil-5-)-methyltransferase (FADH2-oxidizing) activity [GO:0047151]   |
| HSIVP1_RS09350    | --                  | sigma- region 4                                                       | -5.97                                    | 0.00    | 0.00                          | DNA-binding transcription factor activity [GO:0003700]; DNA-templated transcription, initiation [GO:0006352]                                                                                                                                                                    |
| HSIVP1_RS01945    | --                  | malate dehydrogenase                                                  | -2.20                                    | 0.00    | 0.00                          | malate dehydrogenase (decarboxylating) (NAD <sup>+</sup> ) activity [GO:0004471]; malate dehydrogenase (decarboxylating) (NADP <sup>+</sup> ) activity [GO:0004473]; metal ion binding [GO:0046872]; NAD binding [GO:0051287]; oxaloacetate decarboxylase activity [GO:0008948] |
| HSIVP1_RS06715    | Vpar_1382           | aldehyde dehydrogenase                                                | -2.91                                    | 0.00    | 0.00                          | lactaldehyde dehydrogenase activity [GO:0008911]                                                                                                                                                                                                                                |
| HSIVP1_RS06155    | Vpar_1857           | membrane protein                                                      | -5.54                                    | 0.00    | 0.00                          | integral component of membrane [GO:0016021]                                                                                                                                                                                                                                     |
| HSIVP1_RS09465    | scpA                | chromosome partitioning protein                                       | -3.93                                    | 0.00    | 0.00                          | DNA binding [GO:0003677]                                                                                                                                                                                                                                                        |
| HSIVP1_RS06905    | Vpar_0003           | rna-binding protein s4                                                | -2.91                                    | 0.00    | 0.00                          | RNA binding [GO:0003723]                                                                                                                                                                                                                                                        |
| HSIVP1_RS05430    | Vpar_1143           | precorrin-4 c -methyltransferase                                      | -3.14                                    | 0.00    | 0.00                          | precorrin-4 C11-methyltransferase activity [GO:0046026]; cobalamin biosynthetic process [GO:0009236]; oxidation-reduction process [GO:0055114]                                                                                                                                  |



| GeneSymbol (NCBI) | StringDB_locus tags | Gene description                                 | Log <sub>2</sub> FoldChange <sup>a</sup> | P value | P <sub>adj</sub> <sup>b</sup> | GO terms                                                                                                                                                                                                                                                                               |
|-------------------|---------------------|--------------------------------------------------|------------------------------------------|---------|-------------------------------|----------------------------------------------------------------------------------------------------------------------------------------------------------------------------------------------------------------------------------------------------------------------------------------|
| HSIVP1_RS06720    | --                  | rna-binding transcriptional accessory protein    | -3.93                                    | 0.00    | 0.00                          | nucleic acid binding [GO:0003676]; nucleobase-containing compound metabolic process [GO:0006139]                                                                                                                                                                                       |
| HSIVP1_RS00335    | Vpar_1857           | membrane protein                                 | -2.26                                    | 0.00    | 0.00                          | integral component of membrane [GO:0016021]                                                                                                                                                                                                                                            |
| HSIVP1_RS07145    | rpsK                | 30s ribosomal protein s11                        | 2.22                                     | 0.00    | 0.00                          | ribosome [GO:0005840]; rRNA binding [GO:0019843]; structural constituent of ribosome [GO:0003735]; translation [GO:0006412]                                                                                                                                                            |
| HSIVP1_RS04545    | topA                | dna topoisomerase i                              | 2.23                                     | 0.00    | 0.00                          | chromosome [GO:0005694]; DNA binding [GO:0003677]; DNA topoisomerase type I activity [GO:0003917]; metal ion binding [GO:0046872]; DNA topological change [GO:0006265]                                                                                                                 |
| HSIVP1_RS00190    | Vpar_0076           | transcriptional regulator                        | -2.13                                    | 0.00    | 0.00                          | DNA-binding transcription factor activity [GO:0003700]                                                                                                                                                                                                                                 |
| HSIVP1_RS03960    | Vpar_1359           | dna-binding protein                              | 2.25                                     | 0.00    | 0.00                          | integral component of membrane [GO:0016021]                                                                                                                                                                                                                                            |
| HSIVP1_RS04580    | Vpar_0076           | family transcriptional regulator                 | -2.55                                    | 0.00    | 0.00                          | DNA binding [GO:0003677]; DNA-binding transcription factor activity [GO:0003700]                                                                                                                                                                                                       |
| HSIVP1_RS01095    | Vpar_0303           | abc transporter permease                         | -3.97                                    | 0.00    | 0.00                          | integral component of membrane [GO:0016021]; transporter activity [GO:0005215]; sodium ion transport [GO:0006814]; transmembrane transport [GO:0055085]                                                                                                                                |
| HSIVP1_RS04725    | Vpar_0011           | rnd transporter                                  | -2.42                                    | 0.00    | 0.00                          | membrane [GO:0016020]; transporter activity [GO:0005215]; transmembrane transport [GO:0055085]                                                                                                                                                                                         |
| HSIVP1_RS07105    | --                  | 2-oxoacid ferredoxin oxidoreductase subunit beta | -2.02                                    | 0.00    | 0.00                          | 2-oxoglutarate synthase activity [GO:0047553]; thiamine pyrophosphate binding [GO:0030976]                                                                                                                                                                                             |
| HSIVP1_RS03260    | fabH                | 3-oxoacyl-                                       | -2.05                                    | 0.00    | 0.00                          | 3-oxo-glutaryl-[acp] methyl ester reductase activity [GO:0102131]; 3-oxo-pimeloyl-[acp] methyl ester reductase activity [GO:0102132]; 3-oxoacyl-[acyl-carrier-protein] reductase (NADPH) activity [GO:0004316]; NAD binding [GO:0051287]; fatty acid biosynthetic process [GO:0006633] |
| HSIVP1_RS03695    | prfB                | peptide chain release factor 2                   | 2.13                                     | 0.00    | 0.00                          | cytoplasm [GO:0005737]; translation release factor activity, codon specific [GO:0016149]                                                                                                                                                                                               |
| HSIVP1_RS05570    | Vpar_1857           | membrane protein                                 | -2.17                                    | 0.00    | 0.00                          | integral component of membrane [GO:0016021]; transporter activity [GO:0005215]; sodium ion transport [GO:0006814]; transmembrane transport [GO:0055085]                                                                                                                                |
| HSIVP1_RS06750    | Vpar_0835           | methyltransferase                                | -2.95                                    | 0.00    | 0.00                          | methyltransferase activity [GO:0008168]                                                                                                                                                                                                                                                |
| HSIVP1_RS08895    | --                  | pf11148 family protein                           | -4.83                                    | 0.00    | 0.00                          | 0                                                                                                                                                                                                                                                                                      |
| HSIVP1_RS00685    | --                  | tryptophan synthase subunit alpha                | -6.04                                    | 0.00    | 0.00                          | tryptophan synthase activity [GO:0004834]                                                                                                                                                                                                                                              |
| HSIVP1_RS01410    | Vpar_0329           | diaminopimelate dehydrogenase                    | -2.62                                    | 0.00    | 0.00                          | diaminopimelate dehydrogenase activity [GO:0047850]; nucleotide binding [GO:0000166]; diaminopimelate biosynthetic process [GO:0019877]; lysine biosynthetic process via diaminopimelate [GO:0009089]                                                                                  |
| HSIVP1_RS05205    | --                  | sua5 family protein                              | -4.24                                    | 0.00    | 0.00                          | cytoplasm [GO:0005737]; ATP binding [GO:0005524]; double-stranded RNA binding [GO:0003725]; L-threonylcarbamoyladenylate synthase [GO:0061710]; tRNA processing [GO:0008033]                                                                                                           |
| HSIVP1_RS08975    | Vpar_1716           | phosphate acetyltransferase                      | -2.50                                    | 0.00    | 0.00                          | phosphate acetyltransferase activity [GO:0008959]                                                                                                                                                                                                                                      |
| HSIVP1_RS01810    | --                  | conserved domain protein                         | -1.99                                    | 0.00    | 0.00                          | 0                                                                                                                                                                                                                                                                                      |
| HSIVP1_RS04190    | miaB                | rna family                                       | 2.15                                     | 0.00    | 0.00                          | RNA binding [GO:0003723]; RNA methyltransferase activity [GO:0008173]; RNA processing [GO:0006396]                                                                                                                                                                                     |

| GeneSymbol (NCBI) | StringDB_locus tags | Gene description                                      | Log <sub>2</sub> FoldChange <sup>a</sup> | P value | P <sub>adj</sub> <sup>b</sup> | GO terms                                                                                                                                                                                                                                                      |
|-------------------|---------------------|-------------------------------------------------------|------------------------------------------|---------|-------------------------------|---------------------------------------------------------------------------------------------------------------------------------------------------------------------------------------------------------------------------------------------------------------|
| HSIVP1_RS06990    | --                  | twin arginine-targeting protein e family              | 2.08                                     | 0.00    | 0.00                          | integral component of plasma membrane [GO:0005887]; TAT protein transport complex [GO:0033281]; protein transmembrane transporter activity [GO:0008320]; protein secretion [GO:0009306]; protein transport by the Tat complex [GO:0043953]                    |
| HSIVP1_RS01260    | Vpar_0296           | aspartate racemase                                    | -3.24                                    | 0.00    | 0.00                          | racemase activity, acting on amino acids and derivatives [GO:0036361]; cellular amino acid metabolic process [GO:0006520]                                                                                                                                     |
| HSIVP1_RS02565    | pyrB                | aspartate carbamoyltransferase                        | -1.94                                    | 0.00    | 0.00                          | amino acid binding [GO:0016597]; aspartate carbamoyltransferase activity [GO:0004070]; 'de novo' pyrimidine nucleobase biosynthetic process [GO:0006207]; 'de novo' UMP biosynthetic process [GO:0044205]; cellular amino acid metabolic process [GO:0006520] |
| HSIVP1_RS05985    | Vpar_0994           | b12 binding domain protein                            | -2.14                                    | 0.00    | 0.00                          | cobalamin binding [GO:0031419]; metal ion binding [GO:0046872]; methylmalonyl-CoA mutase activity [GO:0004494]                                                                                                                                                |
| HSIVP1_RS09470    | --                  | sporulation initiation inhibitor protein soj          | -2.32                                    | 0.00    | 0.00                          | 0                                                                                                                                                                                                                                                             |
| HSIVP1_RS03425    | Vpar_0745           | branched chain amino acid aminotransferase            | -1.98                                    | 0.00    | 0.00                          | L-isoleucine transaminase activity [GO:0052656]; L-leucine transaminase activity [GO:0052654]; L-valine transaminase activity [GO:0052655]; branched-chain amino acid metabolic process [GO:0009081]                                                          |
| HSIVP1_RS03100    | --                  | abc transporter atp-binding protein                   | -5.59                                    | 0.00    | 0.00                          | ATP binding [GO:0005524]; ATPase activity [GO:0016887]; branched-chain amino acid transmembrane transporter activity [GO:0015658]                                                                                                                             |
| HSIVP1_RS00340    | Vpar_1857           | membrane protein                                      | -2.03                                    | 0.00    | 0.00                          | integral component of membrane [GO:0016021]                                                                                                                                                                                                                   |
| HSIVP1_RS06050    | Vpar_1060           | cbs domain protein                                    | -2.00                                    | 0.00    | 0.00                          | 0                                                                                                                                                                                                                                                             |
| HSIVP1_RS04060    | --                  | trna-2-methylthio-n -dimethylallyl adenosine synthase | 1.94                                     | 0.00    | 0.00                          | cytoplasm [GO:0005737]; 4 iron, 4 sulfur cluster binding [GO:0051539]; metal ion binding [GO:0046872]; transferase activity [GO:0016740]; tRNA modification [GO:0006400]                                                                                      |
| HSIVP1_RS05605    | Vpar_1177           | aminodeoxychorismate lyase                            | 1.87                                     | 0.00    | 0.00                          | integral component of plasma membrane [GO:0005887]; lyase activity [GO:0016829]; lytic endotransglycosylase activity [GO:0008932]; cell wall organization [GO:0071555]; peptidoglycan biosynthetic process [GO:0009252]                                       |
| HSIVP1_RS09145    | --                  | conserved domain protein                              | -2.28                                    | 0.00    | 0.00                          | integral component of membrane [GO:0016021]                                                                                                                                                                                                                   |
| HSIVP1_RS06860    | sepF                | hypothetical protein                                  | -4.82                                    | 0.00    | 0.00                          | 0                                                                                                                                                                                                                                                             |
| HSIVP1_RS01375    | --                  | selenophosphate synthetase                            | -4.41                                    | 0.00    | 0.00                          | ATP binding [GO:0005524]; magnesium ion binding [GO:0000287]; selenide, water dikinase activity [GO:0004756]; selenocysteine biosynthetic process [GO:0016260]                                                                                                |
| HSIVP1_RS02515    | Vpar_1179           | resolvase                                             | -3.59                                    | 0.00    | 0.00                          | 0                                                                                                                                                                                                                                                             |

| GeneSymbol (NCBI) | StringDB_locus tags | Gene description                                  | Log <sub>2</sub> FoldChange <sup>a</sup> | P value | P <sub>adj</sub> <sup>b</sup> | GO terms                                                                                                                                                                                                                                                                                                                                       |
|-------------------|---------------------|---------------------------------------------------|------------------------------------------|---------|-------------------------------|------------------------------------------------------------------------------------------------------------------------------------------------------------------------------------------------------------------------------------------------------------------------------------------------------------------------------------------------|
| HSIVP1_RS02340    | --                  | udp-n-acetylglucosamine 1-carboxyvinyltransferase | 1.94                                     | 0.00    | 0.00                          | cytoplasm [GO:0005737]; UDP-N-acetylglucosamine 1-carboxyvinyltransferase activity [GO:0008760]; cell cycle [GO:0007049]; cell division [GO:0051301]; cell wall organization [GO:0071555]; peptidoglycan biosynthetic process [GO:0009252]; regulation of cell shape [GO:0008360]; UDP-N-acetylgalactosamine biosynthetic process [GO:0019277] |
| HSIVP1_RS02060    | Vpar_1359           | family protein                                    | -2.22                                    | 0.00    | 0.00                          | cell outer membrane [GO:0009279]; integral component of membrane [GO:0016021]                                                                                                                                                                                                                                                                  |
| HSIVP1_RS09765    | --                  | hep hag repeat protein                            | -1.90                                    | 0.00    | 0.00                          | outer membrane [GO:0019867]; pathogenesis [GO:0009405]                                                                                                                                                                                                                                                                                         |
| HSIVP1_RS04495    | polC                | dna polymerase iii subunit alpha                  | 1.93                                     | 0.00    | 0.00                          | cytoplasm [GO:0005737]; 3'-5' exonuclease activity [GO:0008408]; DNA binding [GO:0003677]; DNA-directed DNA polymerase activity [GO:0003887]; DNA-dependent DNA replication [GO:0006261]                                                                                                                                                       |
| HSIVP1_RS09025    | --                  | succinylarginine dihydrolase                      | -5.20                                    | 0.00    | 0.00                          | 0                                                                                                                                                                                                                                                                                                                                              |
| HSIVP1_RS05595    | Vpar_1066           | peptidase u32                                     | -3.20                                    | 0.00    | 0.00                          | peptidase activity [GO:0008233]                                                                                                                                                                                                                                                                                                                |
| HSIVP1_RS04370    | panD                | aspartate 1-decarboxylase                         | -2.35                                    | 0.00    | 0.00                          | cytoplasm [GO:0005737]; aspartate 1-decarboxylase activity [GO:0004068]; alanine biosynthetic process [GO:0006523]; pantothenate biosynthetic process [GO:0015940]                                                                                                                                                                             |
| HSIVP1_RS02335    | --                  | fructose-- class ii                               | -2.50                                    | 0.00    | 0.00                          | fructose 1,6-bisphosphate 1-phosphatase activity [GO:0042132]; metal ion binding [GO:0046872]; gluconeogenesis [GO:0006094]; glycerol metabolic process [GO:0006071]                                                                                                                                                                           |
| HSIVP1_RS03025    | --                  | nucleoid-associated protein                       | -2.32                                    | 0.00    | 0.00                          | nucleoid [GO:0009295]                                                                                                                                                                                                                                                                                                                          |
| HSIVP1_RS03250    | Vpar_0690           | 2-nitropropane dioxygenase                        | -1.85                                    | 0.00    | 0.00                          | enoyl-[acyl-carrier-protein] reductase (NADH) activity [GO:0004318]; enoyl-[acyl-carrier-protein] reductase activity [GO:0016631]; nitronate monooxygenase activity [GO:0018580]                                                                                                                                                               |
| HSIVP1_RS07475    | --                  | MULTISPECIES: hypothetical protein                | -1.92                                    | 0.00    | 0.00                          | 0                                                                                                                                                                                                                                                                                                                                              |
| HSIVP1_RS04585    | --                  | glycine--trna ligase subunit beta                 | -2.75                                    | 0.00    | 0.01                          | cytoplasm [GO:0005737]; arginine-tRNA ligase activity [GO:0004814]; ATP binding [GO:0005524]; glycine-tRNA ligase activity [GO:0004820]; arginyl-tRNA aminoacylation [GO:0006420]; glycyl-tRNA aminoacylation [GO:0006426]                                                                                                                     |
| HSIVP1_RS05165    | tpiA                | triose-phosphate isomerase                        | 2.08                                     | 0.00    | 0.01                          | cytoplasm [GO:0005737]; triose-phosphate isomerase activity [GO:0004807]; gluconeogenesis [GO:0006094]; glycolytic process [GO:0006096]                                                                                                                                                                                                        |
| HSIVP1_RS01890    | --                  | pf06803 family protein                            | -1.87                                    | 0.00    | 0.01                          | 0                                                                                                                                                                                                                                                                                                                                              |
| HSIVP1_RS09245    | --                  | m50 family                                        | -3.02                                    | 0.00    | 0.01                          | integral component of membrane [GO:0016021]; metallopeptidase activity [GO:0008237]                                                                                                                                                                                                                                                            |
| HSIVP1_RS00110    | Vpar_0075           | class i ii                                        | -4.54                                    | 0.00    | 0.01                          | L-aspartate:2-oxoglutarate aminotransferase activity [GO:0004069]; pyridoxal phosphate binding [GO:0030170]; biosynthetic process [GO:0009058]                                                                                                                                                                                                 |
| HSIVP1_RS06910    | proC                | pyrroline-5-carboxylate reductase                 | -2.20                                    | 0.00    | 0.01                          | cytoplasm [GO:0005737]; pyrroline-5-carboxylate reductase activity [GO:0004735]; L-proline biosynthetic process [GO:0055129]                                                                                                                                                                                                                   |

| GeneSymbol (NCBI) | StringDB_locus tags | Gene description                                                                                     | Log <sub>2</sub> FoldChange <sup>a</sup> | P value | P <sub>adj</sub> <sup>b</sup> | GO terms                                                                                                                                                                                                                                                                                                                                                                                                                                                                                                                                                                                            |
|-------------------|---------------------|------------------------------------------------------------------------------------------------------|------------------------------------------|---------|-------------------------------|-----------------------------------------------------------------------------------------------------------------------------------------------------------------------------------------------------------------------------------------------------------------------------------------------------------------------------------------------------------------------------------------------------------------------------------------------------------------------------------------------------------------------------------------------------------------------------------------------------|
| HSIVP1_RS04055    | --                  | alkaline shock protein asp23 family protein                                                          | 1.86                                     | 0.00    | 0.01                          | 0                                                                                                                                                                                                                                                                                                                                                                                                                                                                                                                                                                                                   |
| HSIVP1_RS06930    | queE                | radical sam protein                                                                                  | 2.32                                     | 0.00    | 0.01                          | catalytic activity [GO:0003824]; iron-sulfur cluster binding [GO:0051536]                                                                                                                                                                                                                                                                                                                                                                                                                                                                                                                           |
| HSIVP1_RS01100    | Vpar_1857           | membrane protein                                                                                     | -3.00                                    | 0.00    | 0.01                          | #N/A                                                                                                                                                                                                                                                                                                                                                                                                                                                                                                                                                                                                |
| HSIVP1_RS06020    | Vpar_0921           | polyprenyl synthetase                                                                                | 1.90                                     | 0.00    | 0.01                          | transferase activity [GO:0016740]; isoprenoid biosynthetic process [GO:0008299]                                                                                                                                                                                                                                                                                                                                                                                                                                                                                                                     |
| HSIVP1_RS08225    | --                  | gdsI-like protein                                                                                    | -2.97                                    | 0.00    | 0.01                          | 0                                                                                                                                                                                                                                                                                                                                                                                                                                                                                                                                                                                                   |
| HSIVP1_RS02810    | pth                 | peptidyl-trna hydrolase                                                                              | -1.79                                    | 0.00    | 0.01                          | cytoplasm [GO:0005737]; aminoacyl-tRNA hydrolase activity [GO:0004045]; translation [GO:0006412]                                                                                                                                                                                                                                                                                                                                                                                                                                                                                                    |
| HSIVP1_RS03090    | --                  | branched-chain amino acid abc permease protein                                                       | -3.34                                    | 0.00    | 0.01                          | integral component of membrane [GO:0016021]; plasma membrane [GO:0005886]; transmembrane transporter activity [GO:0022857]                                                                                                                                                                                                                                                                                                                                                                                                                                                                          |
| HSIVP1_RS05290    | --                  | udp-n-acetylglucosamine--n-acetylmuramyl-pyrophosphoryl-undecaprenol n-acetylglucosamine transferase | 1.97                                     | 0.00    | 0.01                          | plasma membrane [GO:0005886]; UDP-N-acetyl-D-glucosamine:N-acetylmuramoyl-L-alanyl-D-glutamyl-meso-2,6-diaminopimelyl-D-alanyl-D-alanine-diphosphoundecaprenol 4-beta-N-acetylglucosaminyltransferase activity [GO:0051991]; undecaprenyldiphospho-muramoylpentapeptide beta-N-acetylglucosaminyltransferase activity [GO:0050511]; carbohydrate metabolic process [GO:0005975]; cell cycle [GO:0007049]; cell division [GO:0051301]; cell wall organization [GO:0071555]; lipid glycosylation [GO:0030259]; peptidoglycan biosynthetic process [GO:0009252]; regulation of cell shape [GO:0008360] |
| HSIVP1_RS03520    | Vpar_0309           | abc transporter substrate binding protein                                                            | -2.03                                    | 0.00    | 0.01                          | 0                                                                                                                                                                                                                                                                                                                                                                                                                                                                                                                                                                                                   |
| HSIVP1_RS03405    | Vpar_0740           | antibiotic biosynthesis monooxygenase                                                                | -1.98                                    | 0.00    | 0.01                          | 0                                                                                                                                                                                                                                                                                                                                                                                                                                                                                                                                                                                                   |
| HSIVP1_RS08795    | Vpar_1681           | replicative dna helicase                                                                             | -2.57                                    | 0.00    | 0.01                          | primosome complex [GO:1990077]; ATP binding [GO:0005524]; DNA binding [GO:0003677]; DNA helicase activity [GO:0003678]; DNA replication, synthesis of RNA primer [GO:0006269]                                                                                                                                                                                                                                                                                                                                                                                                                       |
| HSIVP1_RS09585    | Vpar_0835           | methyltransferase                                                                                    | -2.52                                    | 0.00    | 0.01                          | 0                                                                                                                                                                                                                                                                                                                                                                                                                                                                                                                                                                                                   |
| HSIVP1_RS07025    | --                  | major facilitator family protein                                                                     | -1.71                                    | 0.00    | 0.01                          | #N/A                                                                                                                                                                                                                                                                                                                                                                                                                                                                                                                                                                                                |
| HSIVP1_RS08110    | --                  | cysteine-rich domain protein                                                                         | -2.91                                    | 0.00    | 0.01                          | 0                                                                                                                                                                                                                                                                                                                                                                                                                                                                                                                                                                                                   |
| HSIVP1_RS09415    | sepF                | hypothetical protein                                                                                 | -1.72                                    | 0.00    | 0.01                          | 0                                                                                                                                                                                                                                                                                                                                                                                                                                                                                                                                                                                                   |
| HSIVP1_RS05200    | --                  | low molecular weight phosphotyrosine protein phosphatase                                             | -2.65                                    | 0.00    | 0.01                          | protein tyrosine phosphatase activity [GO:0004725]                                                                                                                                                                                                                                                                                                                                                                                                                                                                                                                                                  |
| HSIVP1_RS06060    | --                  | metallo-beta-lactamase domain protein                                                                | 2.23                                     | 0.00    | 0.01                          | hydrolase activity [GO:0016787]                                                                                                                                                                                                                                                                                                                                                                                                                                                                                                                                                                     |
| HSIVP1_RS00440    | Vpar_1464           | abc transporter                                                                                      | -2.71                                    | 0.00    | 0.01                          | ATP binding [GO:0005524]; ATPase activity [GO:0016887]                                                                                                                                                                                                                                                                                                                                                                                                                                                                                                                                              |
| HSIVP1_RS09390    | --                  | hypothetical protein HSIVP1_1243                                                                     | -2.23                                    | 0.00    | 0.01                          | #N/A                                                                                                                                                                                                                                                                                                                                                                                                                                                                                                                                                                                                |
| HSIVP1_RS07930    | Vpar_1614           | chorismate mutase                                                                                    | -1.88                                    | 0.00    | 0.01                          | cytoplasm [GO:0005737]; chorismate mutase activity [GO:0004106]; prephenate dehydratase activity [GO:0004664]; chorismate metabolic process [GO:0046417]; L-phenylalanine biosynthetic process [GO:0009094]                                                                                                                                                                                                                                                                                                                                                                                         |
| HSIVP1_RS00505    | Vpar_0134           | carbon starvation protein                                                                            | -1.64                                    | 0.00    | 0.01                          | integral component of membrane [GO:0016021]; cellular response to starvation [GO:0009267]                                                                                                                                                                                                                                                                                                                                                                                                                                                                                                           |
| HSIVP1_RS02240    | ftsZ                | cell division protein                                                                                | 1.79                                     | 0.00    | 0.01                          | 0                                                                                                                                                                                                                                                                                                                                                                                                                                                                                                                                                                                                   |

| GeneSymbol (NCBI) | StringDB_locus tags | Gene description                                            | Log <sub>2</sub> FoldChange <sup>a</sup> | P value | P <sub>adj</sub> <sup>b</sup> | GO terms                                                                                                                                                                                                               |
|-------------------|---------------------|-------------------------------------------------------------|------------------------------------------|---------|-------------------------------|------------------------------------------------------------------------------------------------------------------------------------------------------------------------------------------------------------------------|
| HSIVP1_RS09570    | --                  | rnd hae1 hme permease protein                               | -1.76                                    | 0.00    | 0.01                          | #N/A                                                                                                                                                                                                                   |
| HSIVP1_RS00930    | Vpar_0224           | nitrate reductase molybdenum cofactor assembly chaperone    | -1.67                                    | 0.00    | 0.01                          | nitrate reductase activity [GO:0008940]; unfolded protein binding [GO:0051082]; chaperone-mediated protein complex assembly [GO:0051131]                                                                               |
| HSIVP1_RS03965    | rsmG                | 16s rRNA methyltransferase                                  | 1.75                                     | 0.00    | 0.01                          | cytoplasm [GO:0005737]; RNA binding [GO:0003723]; rRNA methyltransferase activity [GO:0008649]; regulation of transcription, DNA-templated [GO:0006355]                                                                |
| HSIVP1_RS04930    | --                  | sporulation and spore germination                           | 1.73                                     | 0.00    | 0.01                          | 0                                                                                                                                                                                                                      |
| HSIVP1_RS05160    | --                  | phosphoglycerate mutase(2,3-diphosphoglycerate-independent) | 1.72                                     | 0.00    | 0.01                          | cytoplasm [GO:0005737]; 2,3-bisphosphoglycerate-independent phosphoglycerate mutase activity [GO:0046537]; manganese ion binding [GO:0030145]; glucose catabolic process [GO:0006007]; glycolytic process [GO:0006096] |
| HSIVP1_RS08370    | Vpar_0002           | dna polymerase iii                                          | 2.36                                     | 0.00    | 0.01                          | 0                                                                                                                                                                                                                      |
| HSIVP1_RS04390    | Vpar_1019           | domain protein                                              | -3.22                                    | 0.00    | 0.01                          | 0                                                                                                                                                                                                                      |
| HSIVP1_RS01935    | --                  | phosphodiesterase family protein                            | -2.97                                    | 0.00    | 0.02                          | hydrolase activity [GO:0016787]; metal ion binding [GO:0046872]                                                                                                                                                        |
| HSIVP1_RS01830    | --                  | mfs transporter                                             | -1.97                                    | 0.00    | 0.02                          | integral component of membrane [GO:0016021]; transmembrane transport [GO:0055085]                                                                                                                                      |
| HSIVP1_RS01455    | --                  | conserved domain protein                                    | 1.64                                     | 0.00    | 0.02                          | 0                                                                                                                                                                                                                      |
| HSIVP1_RS07470    | --                  | cyclic nucleotide-binding domain protein                    | -1.74                                    | 0.00    | 0.02                          | DNA binding [GO:0003677]; regulation of transcription, DNA-templated [GO:0006355]; transcription, DNA-templated [GO:0006351]                                                                                           |
| HSIVP1_RS00690    | --                  | wd repeat-containing protein 60                             | -3.35                                    | 0.00    | 0.02                          | 0                                                                                                                                                                                                                      |
| HSIVP1_RS05765    | hisS                | histidine--trna ligase                                      | -2.04                                    | 0.00    | 0.02                          | cytoplasm [GO:0005737]; ATP binding [GO:0005524]; histidine-tRNA ligase activity [GO:0004821]; histidyl-tRNA aminoacylation [GO:0006427]                                                                               |
| HSIVP1_RS05915    | --                  | conserved domain protein                                    | -2.11                                    | 0.00    | 0.02                          | #N/A                                                                                                                                                                                                                   |
| HSIVP1_RS00455    | --                  | histidinol-phosphatase                                      | -3.42                                    | 0.00    | 0.02                          | #N/A                                                                                                                                                                                                                   |
| HSIVP1_RS01570    | --                  | phosphoribosylaminoimidazolesuccinocarboxamide synthase     | -2.67                                    | 0.00    | 0.02                          | ATP binding [GO:0005524]; phosphoribosylaminoimidazolesuccinocarboxamide synthase activity [GO:0004639]; 'de novo' IMP biosynthetic process [GO:0006189]; cobalamin biosynthetic process [GO:0009236]                  |
| HSIVP1_RS03955    | fmt                 | methionyl-trna formyltransferase                            | 2.15                                     | 0.00    | 0.02                          | methionyl-tRNA formyltransferase activity [GO:0004479]                                                                                                                                                                 |
| HSIVP1_RS02600    | --                  | MULTISPECIES: hypothetical protein                          | 1.59                                     | 0.00    | 0.02                          | 0                                                                                                                                                                                                                      |
| HSIVP1_RS09580    | --                  | membrane pf01595 family                                     | -1.81                                    | 0.00    | 0.02                          | integral component of membrane [GO:0016021]; flavin adenine dinucleotide binding [GO:0050660]                                                                                                                          |
| HSIVP1_RS05210    | --                  | protein-(glutamine-n5) release factor-specific              | 1.75                                     | 0.00    | 0.02                          | nucleic acid binding [GO:0003676]; protein-(glutamine-N5) methyltransferase activity [GO:0102559]; protein-glutamine N-methyltransferase activity [GO:0036009]; peptidyl-glutamine methylation [GO:0018364]            |
| HSIVP1_RS01325    | Vpar_0308           | auxin efflux carrier family protein                         | -2.12                                    | 0.00    | 0.02                          | integral component of membrane [GO:0016021]; transmembrane transport [GO:0055085]                                                                                                                                      |
| HSIVP1_RS04830    | Vpar_1019           | domain protein                                              | 1.95                                     | 0.00    | 0.02                          | 0                                                                                                                                                                                                                      |
| HSIVP1_RS05790    | Vpar_1213           | single-stranded-dna-specific exonuclease                    | 1.64                                     | 0.00    | 0.02                          | 5'-3' exonuclease activity [GO:0008409]; nucleic acid binding [GO:0003676]; DNA recombination [GO:0006310]; DNA repair [GO:0006281]                                                                                    |

| GeneSymbol (NCBI) | StringDB_locus tags | Gene description                                                   | Log <sub>2</sub> FoldChange <sup>a</sup> | P value | P <sub>adj</sub> <sup>b</sup> | GO terms                                                                                                                                                                                                                                                                                      |
|-------------------|---------------------|--------------------------------------------------------------------|------------------------------------------|---------|-------------------------------|-----------------------------------------------------------------------------------------------------------------------------------------------------------------------------------------------------------------------------------------------------------------------------------------------|
| HSIVP1_RS06245    | guaC                | gmp reductase                                                      | -2.23                                    | 0.00    | 0.02                          | cytoplasm [GO:0005737]; GMP reductase complex [GO:1902560]; [isocitrate dehydrogenase (NADP+)] kinase activity [GO:0008772]; GMP reductase activity [GO:0003920]; phosphatase activity [GO:0016791]; glucose metabolic process [GO:0006006]; purine nucleotide metabolic process [GO:0006163] |
| HSIVP1_RS08915    | Vpar_1704           | succinate dehydrogenase and fumarate reductase iron-sulfur protein | -3.50                                    | 0.00    | 0.02                          | 2 iron, 2 sulfur cluster binding [GO:0051537]; electron transfer activity [GO:0009055]; succinate dehydrogenase activity [GO:0000104]; tricarboxylic acid cycle [GO:0006099]                                                                                                                  |
| HSIVP1_RS06880    | Vpar_1423           | delta-aminolevulinic acid dehydratase                              | -1.91                                    | 0.00    | 0.02                          | metal ion binding [GO:0046872]; porphobilinogen synthase activity [GO:0004655]; porphyrin-containing compound biosynthetic process [GO:0006779]                                                                                                                                               |
| HSIVP1_RS06240    | Vpar_1300           | proton-coupled thiamine transporter                                | -2.50                                    | 0.00    | 0.02                          | integral component of membrane [GO:0016021]; plasma membrane [GO:0005886]; thiamine transmembrane transporter activity [GO:0015234]; thiamine transport [GO:0015888]                                                                                                                          |
| HSIVP1_RS01550    | xpt                 | xanthine phosphoribosyltransferase                                 | -1.74                                    | 0.00    | 0.02                          | cytoplasm [GO:0005737]; xanthine phosphoribosyltransferase activity [GO:0000310]; purine ribonucleoside salvage [GO:0006166]; xanthine metabolic process [GO:0046110]; XMP salvage [GO:0032265]                                                                                               |
| HSIVP1_RS05875    | Vpar_1224           | penicillin-binding protein 2                                       | 2.30                                     | 0.00    | 0.02                          | integral component of membrane [GO:0016021]; penicillin binding [GO:0008658]; peptidoglycan glycosyltransferase activity [GO:0008955]; serine-type D-Ala-D-Ala carboxypeptidase activity [GO:0009002]; cell division [GO:0051301]; peptidoglycan biosynthetic process [GO:0009252]            |
| HSIVP1_RS05770    | --                  | coproporphyrinogen dehydrogenase                                   | -1.58                                    | 0.00    | 0.02                          | catalytic activity [GO:0003824]; iron-sulfur cluster binding [GO:0051536]                                                                                                                                                                                                                     |
| HSIVP1_RS04315    | xseA                | exodeoxyribonuclease small subunit                                 | -2.96                                    | 0.00    | 0.03                          | cytoplasm [GO:0005737]; exodeoxyribonuclease VII complex [GO:0009318]; exodeoxyribonuclease VII activity [GO:0008855]; DNA catabolic process [GO:0006308]                                                                                                                                     |
| HSIVP1_RS07850    | secY                | hydrophobic domain protein                                         | -3.87                                    | 0.00    | 0.03                          | integral component of membrane [GO:0016021]                                                                                                                                                                                                                                                   |
| HSIVP1_RS04550    | Vpar_0969           | dna protecting protein                                             | -2.73                                    | 0.00    | 0.03                          | #N/A                                                                                                                                                                                                                                                                                          |
| HSIVP1_RS02310    | --                  | guanine permease                                                   | 2.04                                     | 0.00    | 0.03                          | integral component of membrane [GO:0016021]; transmembrane transporter activity [GO:0022857]                                                                                                                                                                                                  |
| HSIVP1_RS02585    | --                  | dihydropicolinate synthase                                         | 1.65                                     | 0.00    | 0.03                          | 2 iron, 2 sulfur cluster binding [GO:0051537]; electron transfer activity [GO:0009055]; flavin adenine dinucleotide binding [GO:0050660]; metal ion binding [GO:0046872]; 'de novo' UMP biosynthetic process [GO:0044205]                                                                     |
| HSIVP1_RS08120    | Vpar_0041           | s-layer protein                                                    | -1.71                                    | 0.01    | 0.03                          | 0                                                                                                                                                                                                                                                                                             |
| HSIVP1_RS01895    | --                  | acyl- thioester family                                             | 1.85                                     | 0.01    | 0.03                          | hydrolase activity [GO:0016787]                                                                                                                                                                                                                                                               |
| HSIVP1_RS08165    | --                  | galactose-1-phosphate uridylyltransferase                          | -2.40                                    | 0.01    | 0.03                          | UDP-glucose:hexose-1-phosphate uridylyltransferase activity [GO:0008108]; UTP:galactose-1-phosphate uridylyltransferase activity [GO:0017103]; zinc ion binding [GO:0008270]; galactose catabolic process via UDP-galactose [GO:0033499]                                                      |

| GeneSymbol (NCBI) | StringDB_locus tags | Gene description                          | Log <sub>2</sub> FoldChange <sup>a</sup> | P value | P <sub>adj</sub> <sup>b</sup> | GO terms                                                                                                                                                                                                           |
|-------------------|---------------------|-------------------------------------------|------------------------------------------|---------|-------------------------------|--------------------------------------------------------------------------------------------------------------------------------------------------------------------------------------------------------------------|
| HSIVP1_RS06725    | Vpar_1384           | dihydrofolate reductase                   | -3.16                                    | 0.01    | 0.03                          | dihydrofolate reductase activity [GO:0004146]; NADP binding [GO:0050661]; glycine biosynthetic process [GO:0006545]; one-carbon metabolic process [GO:0006730]; tetrahydrofolate biosynthetic process [GO:0046654] |
| HSIVP1_RS02625    | Vpar_1359           | dna-binding protein                       | 1.71                                     | 0.01    | 0.03                          | 0                                                                                                                                                                                                                  |
| HSIVP1_RS02255    | tilS                | trna -lysidine synthetase                 | 2.10                                     | 0.01    | 0.03                          | cytoplasm [GO:0005737]; ATP binding [GO:0005524]; ligase activity, forming carbon-nitrogen bonds [GO:0016879]; tRNA modification [GO:0006400]                                                                      |
| HSIVP1_RS03050    | Vpar_0658           | glucose-6-phosphate isomerase             | 1.57                                     | 0.01    | 0.03                          | #N/A                                                                                                                                                                                                               |
| HSIVP1_RS02470    | --                  | 3-deoxy-8-phosphooctulonate synthase      | 1.50                                     | 0.01    | 0.03                          | cytoplasm [GO:0005737]; 3-deoxy-8-phosphooctulonate synthase activity [GO:0008676]; keto-3-deoxy-D-manno-octulosonic acid biosynthetic process [GO:0019294]                                                        |
| HSIVP1_RS04760    | secY                | preprotein subunit                        | 1.65                                     | 0.01    | 0.03                          | integral component of membrane [GO:0016021]; P-P-bond-hydrolysis-driven protein transmembrane transporter activity [GO:0015450]; protein secretion [GO:0009306]                                                    |
| HSIVP1_RS08055    | Vpar_0011           | efflux rnd mfp subunit                    | 1.50                                     | 0.01    | 0.03                          | membrane [GO:0016020]; transporter activity [GO:0005215]; transmembrane transport [GO:0055085]                                                                                                                     |
| HSIVP1_RS03730    | ftsZ                | cell division protein                     | 1.55                                     | 0.01    | 0.03                          | integral component of membrane [GO:0016021]; plasma membrane [GO:0005886]; cell cycle [GO:0007049]; cell division [GO:0051301]                                                                                     |
| HSIVP1_RS02790    | Vpar_0605           | 3d domain protein                         | 1.51                                     | 0.01    | 0.03                          | outer membrane [GO:0019867]; hydrolase activity, hydrolyzing O-glycosyl compounds [GO:0004553]; peptidoglycan turnover [GO:0009254]                                                                                |
| HSIVP1_RS08205    | --                  | lipid rv2252 family                       | -1.48                                    | 0.01    | 0.03                          | integral component of membrane [GO:0016021]; NAD+ kinase activity [GO:0003951]                                                                                                                                     |
| HSIVP1_RS08875    | Vpar_0074           | TonB-dependent receptor                   | -1.55                                    | 0.01    | 0.04                          | cell outer membrane [GO:0009279]; integral component of membrane [GO:0016021]                                                                                                                                      |
| HSIVP1_RS05320    | --                  | 16s rrna (cytosine -n )-methyltransferase | 1.60                                     | 0.01    | 0.04                          | cytoplasm [GO:0005737]; rRNA (cytosine-N4-)-methyltransferase activity [GO:0071424]; rRNA base methylation [GO:0070475]                                                                                            |
| HSIVP1_RS07905    | --                  | gnat family acetyltransferase             | -1.73                                    | 0.01    | 0.04                          | glucosamine 6-phosphate N-acetyltransferase activity [GO:0004343]; UDP-N-acetylglucosamine biosynthetic process [GO:0006048]                                                                                       |
| HSIVP1_RS05540    | sepF                | hypothetical protein                      | -2.92                                    | 0.01    | 0.04                          | #N/A                                                                                                                                                                                                               |
| HSIVP1_RS01805    | gatB                | glutamyl-trna amidotransferase subunit a  | -1.43                                    | 0.01    | 0.04                          | 0                                                                                                                                                                                                                  |
| HSIVP1_RS06775    | --                  | mfs transporter                           | -2.90                                    | 0.01    | 0.04                          | integral component of membrane [GO:0016021]; transmembrane transport [GO:0055085]                                                                                                                                  |
| HSIVP1_RS08280    | sepF                | hypothetical protein                      | -3.35                                    | 0.01    | 0.04                          | #N/A                                                                                                                                                                                                               |
| HSIVP1_RS05000    | recD2               | atp-dependent dna helicase                | -4.10                                    | 0.01    | 0.04                          | ATP binding [GO:0005524]; ATP-dependent DNA helicase activity [GO:0004003]; nucleic acid binding [GO:0003676]; DNA recombination [GO:0006310]; DNA repair [GO:0006281]                                             |
| HSIVP1_RS02275    | --                  | bifunctional biotin--                     | 1.66                                     | 0.01    | 0.04                          | ATP binding [GO:0005524]; biotin-[acetyl-CoA-carboxylase] ligase activity [GO:0004077]; DNA binding [GO:0003677]; protein biotinylation [GO:0009305]; regulation of transcription, DNA-templated [GO:0006355]      |

| GeneSymbol (NCBI) | StringDB_locus tags | Gene description                                 | Log <sub>2</sub> FoldChange <sup>a</sup> | P value | P <sub>adj</sub> <sup>b</sup> | GO terms                                                                                                                                                                                                                                                              |
|-------------------|---------------------|--------------------------------------------------|------------------------------------------|---------|-------------------------------|-----------------------------------------------------------------------------------------------------------------------------------------------------------------------------------------------------------------------------------------------------------------------|
| HSIVP1_RS02250    | --                  | ppx phosphatase family protein                   | 1.97                                     | 0.01    | 0.04                          | exopolyphosphatase activity [GO:0004309]                                                                                                                                                                                                                              |
| HSIVP1_RS05520    | Vpar_1000           | dna helicase                                     | 1.48                                     | 0.01    | 0.04                          | #N/A                                                                                                                                                                                                                                                                  |
| HSIVP1_RS05910    | ackA                | acetate kinase                                   | -1.43                                    | 0.01    | 0.04                          | cytoplasm [GO:0005737]; acetate kinase activity [GO:0008776]; ATP binding [GO:0005524]; magnesium ion binding [GO:0000287]; acetyl-CoA biosynthetic process [GO:0006085]; organic acid metabolic process [GO:0006082]                                                 |
| HSIVP1_RS01910    | --                  | f420-0:gamma-glutamyl ligase                     | -1.74                                    | 0.01    | 0.04                          | 0                                                                                                                                                                                                                                                                     |
| HSIVP1_RS03485    | --                  | adp-glyceromanno-heptose 6-epimerase             | -1.70                                    | 0.01    | 0.04                          | ADP-glyceromanno-heptose 6-epimerase activity [GO:0008712]; NADP binding [GO:0050661]; ADP-L-glycero-beta-D-manno-heptose biosynthetic process [GO:0097171]; carbohydrate metabolic process [GO:0005975]                                                              |
| HSIVP1_RS05990    | Vpar_1248           | methylmalonyl- mutase                            | -3.09                                    | 0.01    | 0.04                          | cobalamin binding [GO:0031419]; methylmalonyl-CoA mutase activity [GO:0004494]                                                                                                                                                                                        |
| HSIVP1_RS00105    | Vpar_0074           | TonB-dependent receptor                          | -2.35                                    | 0.01    | 0.05                          | cell outer membrane [GO:0009279]; integral component of membrane [GO:0016021]                                                                                                                                                                                         |
| HSIVP1_RS01010    | Vpar_0309           | abc transporter substrate-binding protein        | -1.73                                    | 0.01    | 0.05                          | metal ion binding [GO:0046872]; cell adhesion [GO:0007155]; metal ion transport [GO:0030001]                                                                                                                                                                          |
| HSIVP1_RS06250    | --                  | major facilitator family protein                 | -2.14                                    | 0.01    | 0.05                          | integral component of membrane [GO:0016021]; transmembrane transport [GO:0055085]                                                                                                                                                                                     |
| HSIVP1_RS02365    | --                  | peptidase s55                                    | 1.42                                     | 0.01    | 0.05                          | 0                                                                                                                                                                                                                                                                     |
| HSIVP1_RS05330    | Vpar_1121           | thioredoxin                                      | -1.44                                    | 0.01    | 0.05                          | cell [GO:0005623]; protein disulfide oxidoreductase activity [GO:0015035]; cell redox homeostasis [GO:0045454]; glycerol ether metabolic process [GO:0006662]                                                                                                         |
| HSIVP1_RS03530    | Vpar_0303           | abc transporter permease                         | -2.85                                    | 0.01    | 0.05                          | integral component of membrane [GO:0016021]; plasma membrane [GO:0005886]; transmembrane transporter activity [GO:0022857]                                                                                                                                            |
| HSIVP1_RS08185    | --                  | molybdopterin-binding protein                    | -1.64                                    | 0.01    | 0.05                          | 0                                                                                                                                                                                                                                                                     |
| HSIVP1_RS01080    | Vpar_0254           | formate acetyltransferase                        | -1.36                                    | 0.01    | 0.05                          | cytoplasm [GO:0005737]; formate C-acetyltransferase activity [GO:0008861]; lyase activity [GO:0016829]; carbohydrate metabolic process [GO:0005975]                                                                                                                   |
| HSIVP1_RS05395    | Vpar_0309           | abc transporter substrate-binding protein        | -1.46                                    | 0.01    | 0.05                          | 0                                                                                                                                                                                                                                                                     |
| HSIVP1_RS06830    | --                  | pf01863 family protein                           | -4.14                                    | 0.01    | 0.05                          | 0                                                                                                                                                                                                                                                                     |
| HSIVP1_RS01855    | Vpar_0745           | amino acid aminotransferase                      | -1.59                                    | 0.01    | 0.05                          | D-alanine:2-oxoglutarate aminotransferase activity [GO:0047810]                                                                                                                                                                                                       |
| HSIVP1_RS04745    | Vpar_1072           | family protein                                   | -2.24                                    | 0.01    | 0.05                          | integral component of membrane [GO:0016021]                                                                                                                                                                                                                           |
| HSIVP1_RS07515    | --                  | atp synthase epsilon subunit                     | -1.40                                    | 0.01    | 0.05                          | plasma membrane [GO:0005886]; proton-transporting ATP synthase complex, catalytic core F(1) [GO:0045261]; ATP binding [GO:0005524]; proton-transporting ATP synthase activity, rotational mechanism [GO:0046933]; ATP synthesis coupled proton transport [GO:0015986] |
| HSIVP1_RS09565    | --                  | heavy-metal-binding domain protein               | -2.25                                    | 0.01    | 0.05                          | 0                                                                                                                                                                                                                                                                     |
| HSIVP1_RS01275    | glmS                | glutamine--fructose-6-phosphate aminotransferase | -1.34                                    | 0.01    | 0.05                          | #N/A                                                                                                                                                                                                                                                                  |
| HSIVP1_RS02985    | --                  | MULTISPECIES: hypothetical protein               | -1.36                                    | 0.01    | 0.05                          | 0                                                                                                                                                                                                                                                                     |



| GeneSymbol (NCBI) | StringDB_locus tags | Gene description                                | Log <sub>2</sub> FoldChange <sup>a</sup> | P value | P <sub>adj</sub> <sup>b</sup> | GO terms                                                                                                                                                                                                                                                                                                                                                              |
|-------------------|---------------------|-------------------------------------------------|------------------------------------------|---------|-------------------------------|-----------------------------------------------------------------------------------------------------------------------------------------------------------------------------------------------------------------------------------------------------------------------------------------------------------------------------------------------------------------------|
| HSIVP1_RS04115    | hrcA                | heat-inducible transcription repressor          | 1.90                                     | 0.01    | 0.05                          | DNA binding [GO:0003677]; negative regulation of transcription, DNA-templated [GO:0045892]                                                                                                                                                                                                                                                                            |
| HSIVP1_RS03700    | --                  | mg032 mg096 mg288 family 1                      | 1.37                                     | 0.01    | 0.06                          | 0                                                                                                                                                                                                                                                                                                                                                                     |
| HSIVP1_RS06985    | --                  | heavy metal-associated domain protein           | 1.59                                     | 0.01    | 0.06                          | metal ion binding [GO:0046872]; metal ion transport [GO:0030001]                                                                                                                                                                                                                                                                                                      |
| HSIVP1_RS04910    | Vpar_1039           | ribosomal-protein-alanine acetyltransferase     | 1.45                                     | 0.01    | 0.06                          | cytoplasm [GO:0005737]; acetyltransferase activity [GO:0016407]; N-terminal protein amino acid acetylation [GO:0006474]                                                                                                                                                                                                                                               |
| HSIVP1_RS01705    | --                  | oxaloacetate decarboxylase                      | -1.35                                    | 0.01    | 0.06                          | pyruvate carboxylase activity [GO:0004736]; transferase activity [GO:0016740]                                                                                                                                                                                                                                                                                         |
| HSIVP1_RS01860    | Vpar_0258           | methionine abc transporter atp-binding protein  | -1.55                                    | 0.01    | 0.06                          | plasma membrane [GO:0005886]; amino acid-transporting ATPase activity [GO:0015424]; ATP binding [GO:0005524]; methionine transport [GO:0015821]                                                                                                                                                                                                                       |
| HSIVP1_RS05295    | murD                | udp-n-acetylmuramoylalanine--d-glutamate ligase | 1.53                                     | 0.01    | 0.06                          | cytoplasm [GO:0005737]; ATP binding [GO:0005524]; tetrahydrofolylpolyglutamate synthase activity [GO:0004326]; UDP-N-acetylmuramoylalanine-D-glutamate ligase activity [GO:0008764]; cell cycle [GO:0007049]; cell division [GO:0051301]; cell wall organization [GO:0071555]; peptidoglycan biosynthetic process [GO:0009252]; regulation of cell shape [GO:0008360] |
| HSIVP1_RS02735    | Vpar_0597           | 5-formyltetrahydrofolate cyclo-ligase           | 1.73                                     | 0.01    | 0.06                          | 5-formyltetrahydrofolate cyclo-ligase activity [GO:0030272]; ATP binding [GO:0005524]; metal ion binding [GO:0046872]                                                                                                                                                                                                                                                 |
| HSIVP1_RS02575    | carA                | carbamoyl-phosphate small subunit               | 1.43                                     | 0.01    | 0.06                          | ATP binding [GO:0005524]; carbamoyl-phosphate synthase (glutamine-hydrolyzing) activity [GO:0004088]; 'de novo' pyrimidine nucleobase biosynthetic process [GO:0006207]; 'de novo' UMP biosynthetic process [GO:0044205]; arginine biosynthetic process [GO:0006526]; glutamine metabolic process [GO:0006541]                                                        |
| HSIVP1_RS04825    | Vpar_1022           | atp--guanido phosphotransferase                 | 2.20                                     | 0.01    | 0.06                          | ATP binding [GO:0005524]; kinase activity [GO:0016301]; phosphotransferase activity, nitrogenous group as acceptor [GO:0016775]                                                                                                                                                                                                                                       |
| HSIVP1_RS05170    | pgk                 | phosphoglycerate kinase                         | 1.41                                     | 0.01    | 0.06                          | cytoplasm [GO:0005737]; ATP binding [GO:0005524]; phosphoglycerate kinase activity [GO:0004618]; glycolytic process [GO:0006096]                                                                                                                                                                                                                                      |
| HSIVP1_RS02315    | Vpar_0512           | guanine deaminase                               | 2.56                                     | 0.01    | 0.06                          | guanine deaminase activity [GO:0008892]; zinc ion binding [GO:0008270]; guanine catabolic process [GO:0006147]                                                                                                                                                                                                                                                        |
| HSIVP1_RS09105    | Vpar_1745           | catalase                                        | -2.72                                    | 0.01    | 0.06                          | catalase activity [GO:0004096]; heme binding [GO:0020037]; metal ion binding [GO:0046872]; hydrogen peroxide catabolic process [GO:0042744]; response to oxidative stress [GO:0006979]                                                                                                                                                                                |
| HSIVP1_RS04840    | speD                | s-adenosylmethionine decarboxylase              | -3.70                                    | 0.01    | 0.06                          | adenosylmethionine decarboxylase activity [GO:0004014]; S-adenosylmethioninamine biosynthetic process [GO:0006557]; spermidine biosynthetic process [GO:0008295]                                                                                                                                                                                                      |

| GeneSymbol (NCBI) | StringDB_locus tags | Gene description                                       | Log <sub>2</sub> FoldChange <sup>a</sup> | P value | P <sub>adj</sub> <sup>b</sup> | GO terms                                                                                                                                                                                                                  |
|-------------------|---------------------|--------------------------------------------------------|------------------------------------------|---------|-------------------------------|---------------------------------------------------------------------------------------------------------------------------------------------------------------------------------------------------------------------------|
| HSIVP1_RS02455    | --                  | 3-deoxy-d-manno-octulosonic-acid transferase           | 1.45                                     | 0.01    | 0.06                          | integral component of membrane [GO:0016021]; transferase activity [GO:0016740]                                                                                                                                            |
| HSIVP1_RS02545    | --                  | glmZ -inactivating ntpase                              | -1.72                                    | 0.01    | 0.06                          | ATP binding [GO:0005524]; GTP binding [GO:0005525]; kinase activity [GO:0016301]                                                                                                                                          |
| HSIVP1_RS09620    | --                  | glycosyl transferases group 1 family protein           | 1.67                                     | 0.01    | 0.06                          | transferase activity [GO:0016740]                                                                                                                                                                                         |
| HSIVP1_RS03905    | Vpar_0838           | fibronectin-binding protein a domain protein           | 1.40                                     | 0.01    | 0.06                          | #N/A                                                                                                                                                                                                                      |
| HSIVP1_RS09030    | Vpar_1726           | alkylphosphonate utilization operon protein            | -1.46                                    | 0.01    | 0.06                          | 0                                                                                                                                                                                                                         |
| HSIVP1_RS06485    | --                  | pts maltose transporter subunit iibc                   | -1.59                                    | 0.01    | 0.06                          | protein-N(Pi)-phosphohistidine-sugar phosphotransferase activity [GO:0008982]; phosphoenolpyruvate-dependent sugar phosphotransferase system [GO:0009401]                                                                 |
| HSIVP1_RS00570    | Vpar_1072           | membrane protein                                       | -1.74                                    | 0.01    | 0.06                          | integral component of membrane [GO:0016021]                                                                                                                                                                               |
| HSIVP1_RS06015    | Vpar_1010           | preprotein translocase subunit                         | 1.42                                     | 0.01    | 0.06                          | integral component of plasma membrane [GO:0005887]; TAT protein transport complex [GO:0033281]; protein transmembrane transporter activity [GO:0008320]; protein transport by the Tat complex [GO:0043953]                |
| HSIVP1_RS09155    | Vpar_0058           | proton channel family protein                          | 1.55                                     | 0.01    | 0.06                          | integral component of membrane [GO:0016021]; protein transport [GO:0015031]                                                                                                                                               |
| HSIVP1_RS03735    | Vpar_0809           | peptidase m23                                          | 1.42                                     | 0.01    | 0.06                          | 0                                                                                                                                                                                                                         |
| HSIVP1_RS01190    | surE                | 5 -nucleotidase                                        | -1.70                                    | 0.01    | 0.06                          | 0                                                                                                                                                                                                                         |
| HSIVP1_RS02870    | Vpar_0605           | 3d domain protein                                      | 1.82                                     | 0.01    | 0.06                          | integral component of membrane [GO:0016021]; outer membrane [GO:0019867]; hydrolase activity, hydrolyzing O-glycosyl compounds [GO:0004553]; peptidoglycan turnover [GO:0009254]                                          |
| HSIVP1_RS05215    | prfA                | peptide chain release factor 1                         | 1.36                                     | 0.01    | 0.06                          | cytoplasm [GO:0005737]; translation release factor activity, codon specific [GO:0016149]                                                                                                                                  |
| HSIVP1_RS02505    | Vpar_0273           | permease                                               | -1.95                                    | 0.01    | 0.06                          | integral component of membrane [GO:0016021]                                                                                                                                                                               |
| HSIVP1_RS02400    | --                  | gram-positive signal peptide ysirk family              | -1.65                                    | 0.01    | 0.07                          | unfolded protein binding [GO:0051082]                                                                                                                                                                                     |
| HSIVP1_RS03855    | Vpar_0828           | fad-dependent oxidoreductase                           | 1.41                                     | 0.01    | 0.07                          | 0                                                                                                                                                                                                                         |
| HSIVP1_RS06225    | Vpar_1297           | cupin domain protein                                   | -2.23                                    | 0.02    | 0.07                          | 0                                                                                                                                                                                                                         |
| HSIVP1_RS06500    | --                  | iron(III) dicitrate transport ATP-binding protein FecE | 1.65                                     | 0.02    | 0.07                          | ATP binding [GO:0005524]; ATPase activity [GO:0016887]                                                                                                                                                                    |
| HSIVP1_RS05690    | Vpar_1203           | radical sam protein                                    | -2.94                                    | 0.02    | 0.07                          | 4 iron, 4 sulfur cluster binding [GO:0051539]; carbon-nitrogen lyase activity [GO:0016840]; magnesium ion binding [GO:0000287]; S-adenosyl-L-methionine binding [GO:1904047]; queuosine biosynthetic process [GO:0008616] |
| HSIVP1_RS03085    | Vpar_0665           | branched-chain amino acid abc permease protein         | -1.52                                    | 0.02    | 0.07                          | integral component of membrane [GO:0016021]; plasma membrane [GO:0005886]; transmembrane transporter activity [GO:0022857]                                                                                                |
| HSIVP1_RS00205    | --                  | electron transporter                                   | -2.01                                    | 0.02    | 0.07                          | electron transfer activity [GO:0009055]                                                                                                                                                                                   |
| HSIVP1_RS05390    | Vpar_1132           | cobalt chelatase                                       | -1.41                                    | 0.02    | 0.07                          | metal ion binding [GO:0046872]; sirohydrochlorin cobaltochelatase activity [GO:0016852]; anaerobic cobalamin biosynthetic process [GO:0019251]                                                                            |
| HSIVP1_RS00520    | Vpar_0136           | copper amine oxidase                                   | -1.88                                    | 0.02    | 0.07                          | 0                                                                                                                                                                                                                         |
| HSIVP1_RS08160    | mutL                | dna mismatch repair protein                            | 1.59                                     | 0.02    | 0.07                          | 8-oxo-7,8-dihydroguanosine triphosphate pyrophosphatase activity [GO:0008413]; DNA repair [GO:0006281]                                                                                                                    |

| GeneSymbol (NCBI) | StringDB_locus tags | Gene description                                              | Log <sub>2</sub> FoldChange <sup>a</sup> | P value | P <sub>adj</sub> <sup>b</sup> | GO terms                                                                                                                                                                                                                                                                                                    |
|-------------------|---------------------|---------------------------------------------------------------|------------------------------------------|---------|-------------------------------|-------------------------------------------------------------------------------------------------------------------------------------------------------------------------------------------------------------------------------------------------------------------------------------------------------------|
| HSIVP1_RS02030    | Vpar_1072           | membrane protein                                              | -1.68                                    | 0.02    | 0.07                          | integral component of membrane [GO:0016021]; plasma membrane [GO:0005886]; metal ion transmembrane transporter activity [GO:0046873]                                                                                                                                                                        |
| HSIVP1_RS04510    | Vpar_0961           | competence protein                                            | 1.68                                     | 0.02    | 0.07                          | integral component of membrane [GO:0016021]; DNA binding [GO:0003677]; DNA repair [GO:0006281]                                                                                                                                                                                                              |
| HSIVP1_RS05005    | rpmB                | 50s ribosomal protein l28                                     | 1.38                                     | 0.02    | 0.07                          | ribosome [GO:0005840]; structural constituent of ribosome [GO:0003735]; translation [GO:0006412]                                                                                                                                                                                                            |
| HSIVP1_RS02375    | Vpar_0807           | abc atp-binding protein                                       | 1.43                                     | 0.02    | 0.07                          | ATP binding [GO:0005524]; ATPase activity [GO:0016887]                                                                                                                                                                                                                                                      |
| HSIVP1_RS05400    | --                  | ferrichrome abc atp-binding protein                           | -1.36                                    | 0.02    | 0.07                          | ATP binding [GO:0005524]; ATPase activity [GO:0016887]                                                                                                                                                                                                                                                      |
| HSIVP1_RS00755    | guaA                | gmp synthetase                                                | -1.52                                    | 0.02    | 0.08                          | ATP binding [GO:0005524]; GMP synthase (glutamine-hydrolyzing) activity [GO:0003922]; pyrophosphatase activity [GO:0016462]; glutamine metabolic process [GO:0006541]; GMP biosynthetic process [GO:0006177]                                                                                                |
| HSIVP1_RS03465    | Vpar_0398           | family transcriptional regulator                              | 1.30                                     | 0.02    | 0.08                          | ATP binding [GO:0005524]; DNA binding [GO:0003677]; zinc ion binding [GO:0008270]; negative regulation of transcription, DNA-templated [GO:0045892]                                                                                                                                                         |
| HSIVP1_RS08255    | Vpar_0006           | hypothetical protein                                          | 1.27                                     | 0.02    | 0.08                          | 0                                                                                                                                                                                                                                                                                                           |
| HSIVP1_RS09015    | Vpar_0112           | isochorismatase family protein                                | -1.96                                    | 0.02    | 0.08                          | nicotinamidase activity [GO:0008936]                                                                                                                                                                                                                                                                        |
| HSIVP1_RS03455    | --                  | aminopeptidase i zinc metalloprotease                         | -1.79                                    | 0.02    | 0.08                          | aminopeptidase activity [GO:0004177]; metalloprotease activity [GO:0008237]; zinc ion binding [GO:0008270]                                                                                                                                                                                                  |
| HSIVP1_RS09400    | Vpar_0993           | conserved domain protein                                      | 1.54                                     | 0.02    | 0.08                          | integral component of membrane [GO:0016021]                                                                                                                                                                                                                                                                 |
| HSIVP1_RS07605    | Vpar_1549           | amino acid carrier protein                                    | -1.32                                    | 0.02    | 0.08                          | integral component of membrane [GO:0016021]; plasma membrane [GO:0005886]; alanine:sodium symporter activity [GO:0015655]                                                                                                                                                                                   |
| HSIVP1_RS04145    | --                  | trna (n -l-threonylcarbamoyladenine -c)-methylthiotransferase | 1.28                                     | 0.02    | 0.08                          | 4 iron, 4 sulfur cluster binding [GO:0051539]; N6-threonylcarbamoyladenine methylthiotransferase activity [GO:0035598]                                                                                                                                                                                      |
| HSIVP1_RS09135    | Vpar_1753           | adenylosuccinate lyase                                        | 1.39                                     | 0.02    | 0.08                          | (S)-2-(5-amino-1-(5-phospho-D-ribose)imidazole-4-carboxamido)succinate AMP-lyase (fumarate-forming) activity [GO:0070626]; N6-(1,2-dicarboxylethyl)AMP AMP-lyase (fumarate-forming) activity [GO:0004018]; 'de novo' AMP biosynthetic process [GO:0044208]; 'de novo' IMP biosynthetic process [GO:0006189] |
| HSIVP1_RS06535    | --                  | galactosyl/diacylglycerol synthase                            | 1.32                                     | 0.02    | 0.08                          | #N/A                                                                                                                                                                                                                                                                                                        |
| HSIVP1_RS05945    | Vpar_1290           | dass family                                                   | -1.25                                    | 0.02    | 0.08                          | integral component of membrane [GO:0016021]; transporter activity [GO:0005215]; sodium ion transport [GO:0006814]; transmembrane transport [GO:0055085]                                                                                                                                                     |
| HSIVP1_RS09595    | --                  | arylsulfatase                                                 | -2.08                                    | 0.02    | 0.08                          | integral component of membrane [GO:0016021]; sulfuric ester hydrolase activity [GO:0008484]                                                                                                                                                                                                                 |
| HSIVP1_RS03950    | def                 | peptide deformylase                                           | 1.43                                     | 0.02    | 0.08                          | #N/A                                                                                                                                                                                                                                                                                                        |
| HSIVP1_RS01130    | --                  | peptidase propeptide and ypeb domain protein                  | -1.22                                    | 0.02    | 0.08                          | 0                                                                                                                                                                                                                                                                                                           |
| HSIVP1_RS05695    | --                  | queuosine biosynthesis protein                                | -2.04                                    | 0.02    | 0.09                          | lyase activity [GO:0016829]; metal ion binding [GO:0046872]; queuosine biosynthetic process [GO:0008616]                                                                                                                                                                                                    |
| HSIVP1_RS04565    | rnhB                | ribonuclease hii                                              | 1.45                                     | 0.02    | 0.09                          | cytoplasm [GO:0005737]; manganese ion binding [GO:0030145]; RNA binding [GO:0003723]; RNA-DNA hybrid ribonuclease activity [GO:0004523]; RNA catabolic process [GO:0006401]                                                                                                                                 |

| GeneSymbol (NCBI) | StringDB_locus tags | Gene description                              | Log <sub>2</sub> FoldChange <sup>a</sup> | P value | P <sub>adj</sub> <sup>b</sup> | GO terms                                                                                                                                                                                                                       |
|-------------------|---------------------|-----------------------------------------------|------------------------------------------|---------|-------------------------------|--------------------------------------------------------------------------------------------------------------------------------------------------------------------------------------------------------------------------------|
| HSIVP1_RS01460    | trmB                | trna (guanine-n -)-methyltransferase          | 1.22                                     | 0.02    | 0.09                          | tRNA (guanine-N7-)-methyltransferase activity [GO:0008176]                                                                                                                                                                     |
| HSIVP1_RS03440    | Vpar_0267           | class i ii                                    | -3.75                                    | 0.02    | 0.10                          | L-aspartate:2-oxoglutarate aminotransferase activity [GO:0004069]; pyridoxal phosphate binding [GO:0030170]; biosynthetic process [GO:0009058]                                                                                 |
| HSIVP1_RS03705    | Vpar_1072           | membrane protein                              | 1.25                                     | 0.02    | 0.10                          | integral component of membrane [GO:0016021]                                                                                                                                                                                    |
| HSIVP1_RS01305    | Vpar_0006           | hypothetical protein                          | -1.32                                    | 0.02    | 0.10                          | #N/A                                                                                                                                                                                                                           |
| HSIVP1_RS02700    | ruvC                | crossover junction endodeoxyribonuclease      | 1.80                                     | 0.02    | 0.10                          | crossover junction endodeoxyribonuclease activity [GO:0008821]; magnesium ion binding [GO:0000287]; nucleic acid binding [GO:0003676]; DNA recombination [GO:0006310]; DNA repair [GO:0006281]                                 |
| HSIVP1_RS00875    | bioB                | biotin synthase                               | -1.84                                    | 0.02    | 0.10                          | 2 iron, 2 sulfur cluster binding [GO:0051537]; 4 iron, 4 sulfur cluster binding [GO:0051539]; biotin synthase activity [GO:0004076]; iron ion binding [GO:0005506]; biotin biosynthetic process [GO:0009102]                   |
| HSIVP1_RS07755    | Vpar_0476           | rrf2 family transcriptional regulator         | -1.52                                    | 0.02    | 0.10                          | DNA binding [GO:0003677]                                                                                                                                                                                                       |
| HSIVP1_RS02465    | kdsB                | 3-deoxy-manno-octulosonate cytidyltransferase | 1.19                                     | 0.03    | 0.10                          | cytoplasm [GO:0005737]; 3-deoxy-manno-octulosonate cytidyltransferase activity [GO:0008690]; CMP-keto-3-deoxy-D-manno-octulosonic acid biosynthetic process [GO:0033468]; lipopolysaccharide biosynthetic process [GO:0009103] |
| HSIVP1_RS02445    | Vpar_0538           | lipid-a-disaccharide synthase                 | 1.24                                     | 0.03    | 0.10                          | lipid-A-disaccharide synthase activity [GO:0008915]; lipid A biosynthetic process [GO:0009245]                                                                                                                                 |
| HSIVP1_RS06695    | --                  | phosphatidate phosphatase                     | 1.90                                     | 0.03    | 0.11                          | #N/A                                                                                                                                                                                                                           |
| HSIVP1_RS05880    | Vpar_1227           | rod shape-determining protein                 | 1.85                                     | 0.03    | 0.11                          | integral component of membrane [GO:0016021]; regulation of cell shape [GO:0008360]                                                                                                                                             |
| HSIVP1_RS06165    | Vpar_1283           | dyp-type peroxidase family protein            | -1.17                                    | 0.03    | 0.11                          | heme binding [GO:0020037]; peroxidase activity [GO:0004601]                                                                                                                                                                    |
| HSIVP1_RS07975    | Vpar_0398           | family transcriptional regulator              | -4.59                                    | 0.03    | 0.11                          | DNA-binding transcription factor activity [GO:0003700]                                                                                                                                                                         |
| HSIVP1_RS06135    | glnS                | glutamine--trna ligase                        | -1.25                                    | 0.03    | 0.11                          | cytoplasm [GO:0005737]; ATP binding [GO:0005524]; glutamine-tRNA ligase activity [GO:0004819]; glutaminyl-tRNA aminoacylation [GO:0006425]; glutamyl-tRNA aminoacylation [GO:0006424]                                          |
| HSIVP1_RS02270    | Vpar_1072           | membrane protein                              | 1.27                                     | 0.03    | 0.11                          | integral component of membrane [GO:0016021]                                                                                                                                                                                    |
| HSIVP1_RS05645    | --                  | hydrogenase expression formation protein      | 1.69                                     | 0.03    | 0.11                          | enzyme activator activity [GO:0008047]; peptidase activity [GO:0008233]                                                                                                                                                        |
| HSIVP1_RS08970    | --                  | iron-sulfur cluster repair di-iron protein    | -4.58                                    | 0.03    | 0.11                          | cytoplasm [GO:0005737]; metal ion binding [GO:0046872]                                                                                                                                                                         |
| HSIVP1_RS06970    | ilvD                | dihydroxy-acid dehydratase                    | -1.97                                    | 0.03    | 0.11                          | 4 iron, 4 sulfur cluster binding [GO:0051539]; dihydroxy-acid dehydratase activity [GO:0004160]; metal ion binding [GO:0046872]; isoleucine biosynthetic process [GO:0009097]; valine biosynthetic process [GO:0009099]        |
| HSIVP1_RS07640    | --                  | pf12889 family protein                        | 1.19                                     | 0.03    | 0.11                          | integral component of membrane [GO:0016021]                                                                                                                                                                                    |
| HSIVP1_RS05870    | cobQ                | cobyric acid synthase                         | 1.27                                     | 0.03    | 0.11                          | 0                                                                                                                                                                                                                              |
| HSIVP1_RS08170    | --                  | serine threonine protein phosphatase          | -1.41                                    | 0.03    | 0.11                          | hydrolase activity [GO:0016787]                                                                                                                                                                                                |
| HSIVP1_RS00575    | Vpar_0141           | cysteine synthase                             | 1.85                                     | 0.03    | 0.11                          | cysteine synthase activity [GO:0004124]; cysteine biosynthetic process from serine [GO:0006535]                                                                                                                                |
| HSIVP1_RS05900    | --                  | septum formation protein maf                  | 3.65                                     | 0.03    | 0.11                          | cytoplasm [GO:0005737]; nucleoside-triphosphate diphosphatase activity [GO:0047429]                                                                                                                                            |

| GeneSymbol (NCBI) | StringDB_locus tags | Gene description                                                                                           | Log <sub>2</sub> FoldChange <sup>a</sup> | P value | P <sub>adj</sub> <sup>b</sup> | GO terms                                                                                                                                                                                                                                                                                                                                                                                                                                                                                                               |
|-------------------|---------------------|------------------------------------------------------------------------------------------------------------|------------------------------------------|---------|-------------------------------|------------------------------------------------------------------------------------------------------------------------------------------------------------------------------------------------------------------------------------------------------------------------------------------------------------------------------------------------------------------------------------------------------------------------------------------------------------------------------------------------------------------------|
| HSIVP1_RS07845    | --                  | methionine abc transporter substrate-binding protein                                                       | -4.59                                    | 0.03    | 0.11                          | 0                                                                                                                                                                                                                                                                                                                                                                                                                                                                                                                      |
| HSIVP1_RS00850    | Vpar_0400           | transcriptional family                                                                                     | 1.96                                     | 0.03    | 0.11                          | DNA binding [GO:0003677]; DNA-binding transcription factor activity [GO:0003700]; transcription, DNA-templated [GO:0006351]                                                                                                                                                                                                                                                                                                                                                                                            |
| HSIVP1_RS05285    | murC                | udp-n-acetylmuramate--l-alanine ligase                                                                     | 1.43                                     | 0.03    | 0.11                          | cytoplasm [GO:0005737]; ATP binding [GO:0005524]; UDP-N-acetylmuramate-L-alanine ligase activity [GO:0008763]; cell cycle [GO:0007049]; cell division [GO:0051301]; cell wall organization [GO:0071555]; peptidoglycan biosynthetic process [GO:0009252]; regulation of cell shape [GO:0008360]                                                                                                                                                                                                                        |
| HSIVP1_RS01685    | --                  | periplasmic pf09992 family                                                                                 | 1.24                                     | 0.03    | 0.11                          | 0                                                                                                                                                                                                                                                                                                                                                                                                                                                                                                                      |
| HSIVP1_RS01405    | Vpar_0325           | cyclopropane-fatty-acyl-phospholipid synthase                                                              | -2.00                                    | 0.03    | 0.11                          | cyclopropane-fatty-acyl-phospholipid synthase activity [GO:0008825]; lipid biosynthetic process [GO:0008610]                                                                                                                                                                                                                                                                                                                                                                                                           |
| HSIVP1_RS07350    | rplJ                | 50s ribosomal protein l10                                                                                  | -1.65                                    | 0.03    | 0.11                          | ribosome [GO:0005840]; large ribosomal subunit rRNA binding [GO:0070180]; ribosome biogenesis [GO:0042254]; translation [GO:0006412]                                                                                                                                                                                                                                                                                                                                                                                   |
| HSIVP1_RS02800    | --                  | bifunctional n-acetylglucosamine-1-phosphate uridylyltransferase glucosamine-1-phosphate acetyltransferase | 1.58                                     | 0.03    | 0.12                          | cytoplasm [GO:0005737]; glucosamine-1-phosphate N-acetyltransferase activity [GO:0019134]; magnesium ion binding [GO:0000287]; UDP-N-acetylglucosamine diphosphorylase activity [GO:0003977]; cell morphogenesis [GO:0000902]; cell wall organization [GO:0071555]; lipid A biosynthetic process [GO:0009245]; lipopolysaccharide biosynthetic process [GO:0009103]; peptidoglycan biosynthetic process [GO:0009252]; regulation of cell shape [GO:0008360]; UDP-N-acetylglucosamine biosynthetic process [GO:0006048] |
| HSIVP1_RS06940    | --                  | pf11694 family protein                                                                                     | 1.27                                     | 0.03    | 0.12                          | integral component of membrane [GO:0016021]                                                                                                                                                                                                                                                                                                                                                                                                                                                                            |
| HSIVP1_RS01120    | metAA               | homoserine o-succinyltransferase                                                                           | 1.61                                     | 0.03    | 0.12                          | cytoplasm [GO:0005737]; homoserine O-acetyltransferase activity [GO:0004414]; homoserine O-succinyltransferase activity [GO:0008899]; L-methionine biosynthetic process from homoserine via O-succinyl-L-homoserine and cystathionine [GO:0019281]                                                                                                                                                                                                                                                                     |
| HSIVP1_RS10055    | --                  | n-acetylglucosaminylphosphatidylinositol deacetylase                                                       | 1.15                                     | 0.03    | 0.12                          | 0                                                                                                                                                                                                                                                                                                                                                                                                                                                                                                                      |
| HSIVP1_RS06025    | Vpar_1324           | gtp-binding protein                                                                                        | 1.36                                     | 0.03    | 0.12                          | GTP binding [GO:0005525]; metal ion binding [GO:0046872]; cell septum assembly [GO:0090529]                                                                                                                                                                                                                                                                                                                                                                                                                            |
| HSIVP1_RS07325    | rpoB                | dna-directed rna polymerase subunit beta                                                                   | 1.22                                     | 0.03    | 0.12                          | DNA binding [GO:0003677]; DNA-directed 5'-3' RNA polymerase activity [GO:0003899]; transcription, DNA-templated [GO:0006351]                                                                                                                                                                                                                                                                                                                                                                                           |
| HSIVP1_RS01925    | rph                 | ribonuclease ph                                                                                            | -3.01                                    | 0.03    | 0.12                          | 3'-5'-exoribonuclease activity [GO:0000175]; tRNA binding [GO:0000049]; tRNA nucleotidyltransferase activity [GO:0009022]; rRNA catabolic process [GO:0016075]; rRNA processing [GO:0006364]; tRNA processing [GO:0008033]                                                                                                                                                                                                                                                                                             |
| HSIVP1_RS03740    | Vpar_0810           | s41 family                                                                                                 | 1.63                                     | 0.03    | 0.12                          | serine-type peptidase activity [GO:0008236]                                                                                                                                                                                                                                                                                                                                                                                                                                                                            |

| GeneSymbol (NCBI) | StringDB_locus tags | Gene description                                              | Log <sub>2</sub> FoldChange <sup>a</sup> | P value | P <sub>adj</sub> <sup>b</sup> | GO terms                                                                                                                                                                                                                       |
|-------------------|---------------------|---------------------------------------------------------------|------------------------------------------|---------|-------------------------------|--------------------------------------------------------------------------------------------------------------------------------------------------------------------------------------------------------------------------------|
| HSIVP1_RS00565    | queC                | preq synthase                                                 | -2.53                                    | 0.03    | 0.12                          | cytoplasm [GO:0005737]; oxidoreductase activity, acting on other nitrogenous compounds as donors, with NAD or NADP as acceptor [GO:0046857]; preQ1 synthase activity [GO:0033739]; queuosine biosynthetic process [GO:0008616] |
| HSIVP1_RS09300    | Vpar_1072           | membrane protein                                              | -1.19                                    | 0.03    | 0.12                          | integral component of membrane [GO:0016021]                                                                                                                                                                                    |
| HSIVP1_RS02710    | ruvA                | holliday junction dna helicase                                | 1.45                                     | 0.03    | 0.12                          | ATP binding [GO:0005524]; DNA binding [GO:0003677]; four-way junction helicase activity [GO:0009378]; DNA recombination [GO:0006310]; DNA repair [GO:0006281]; SOS response [GO:0009432]                                       |
| HSIVP1_RS01820    | Vpar_1072           | membrane protein                                              | 1.24                                     | 0.03    | 0.12                          | 0                                                                                                                                                                                                                              |
| HSIVP1_RS03550    | --                  | dutp diphosphatase                                            | 1.26                                     | 0.03    | 0.12                          | dUTP diphosphatase activity [GO:0004170]; metal ion binding [GO:0046872]; dUTP metabolic process [GO:0046080]                                                                                                                  |
| HSIVP1_RS09630    | Vpar_0020           | o-antigen polymerase                                          | 1.42                                     | 0.03    | 0.12                          | integral component of membrane [GO:0016021]                                                                                                                                                                                    |
| HSIVP1_RS02390    | Vpar_0554           | peptidase                                                     | 1.22                                     | 0.03    | 0.12                          | 0                                                                                                                                                                                                                              |
| HSIVP1_RS07165    | map                 | methionine aminopeptidase                                     | 1.14                                     | 0.03    | 0.12                          | metal ion binding [GO:0046872]; metalloaminopeptidase activity [GO:0070006]; protein initiator methionine removal [GO:0070084]                                                                                                 |
| HSIVP1_RS01180    | --                  | small conductance mechanosensitive ion channel family protein | -1.60                                    | 0.03    | 0.12                          | integral component of membrane [GO:0016021]; transmembrane transport [GO:0055085]                                                                                                                                              |
| HSIVP1_RS09755    | Vpar_0993           | conserved domain protein                                      | 1.17                                     | 0.03    | 0.13                          | 0                                                                                                                                                                                                                              |
| HSIVP1_RS05890    | Vpar_1227           | rod shape-determining protein                                 | 1.80                                     | 0.03    | 0.13                          | cell morphogenesis [GO:0000902]                                                                                                                                                                                                |
| HSIVP1_RS02895    | ksgA                | dimethyladenosine transferase                                 | 1.22                                     | 0.03    | 0.13                          | cytoplasm [GO:0005737]; 16S rRNA (adenine(1518)-N(6)/adenine(1519)-N(6))-dimethyltransferase activity [GO:0052908]; RNA binding [GO:0003723]; rRNA (adenine-N6,N6-)-dimethyltransferase activity [GO:0000179]                  |
| HSIVP1_RS03670    | --                  | glutamine abc transporter permease                            | 1.19                                     | 0.04    | 0.13                          | ATP-binding cassette (ABC) transporter complex [GO:0043190]; transmembrane transporter activity [GO:0022857]; nitrogen compound transport [GO:0071705]                                                                         |
| HSIVP1_RS04070    | mutL                | dna mismatch repair protein                                   | 1.17                                     | 0.04    | 0.13                          | ATP binding [GO:0005524]; damaged DNA binding [GO:0003684]; mismatched DNA binding [GO:0030983]; mismatch repair [GO:0006298]                                                                                                  |
| HSIVP1_RS07885    | Vpar_0011           | membrane-fusion protein                                       | 1.16                                     | 0.04    | 0.13                          | 0                                                                                                                                                                                                                              |
| HSIVP1_RS02290    | greA                | transcription elongation factor                               | 1.25                                     | 0.04    | 0.13                          | DNA binding [GO:0003677]; RNA polymerase binding [GO:0070063]; translation elongation factor activity [GO:0003746]; regulation of DNA-templated transcription, elongation [GO:0032784]                                         |
| HSIVP1_RS02770    | Vpar_0554           | peptidase                                                     | -1.61                                    | 0.04    | 0.13                          | #N/A                                                                                                                                                                                                                           |
| HSIVP1_RS07725    | Vpar_0603           | sodium:proton antiporter                                      | 1.39                                     | 0.04    | 0.13                          | integral component of membrane [GO:0016021]                                                                                                                                                                                    |
| HSIVP1_RS02170    | --                  | peptide abc transporter atp-binding protein                   | 1.24                                     | 0.04    | 0.13                          | ATP binding [GO:0005524]; ATPase activity [GO:0016887]; peptide transport [GO:0015833]                                                                                                                                         |
| HSIVP1_RS08050    | --                  | pf09924 family protein                                        | -1.52                                    | 0.04    | 0.13                          | 0                                                                                                                                                                                                                              |
| HSIVP1_RS08430    | Vpar_0006           | hypothetical protein                                          | 2.00                                     | 0.04    | 0.13                          | 0                                                                                                                                                                                                                              |

| GeneSymbol (NCBI) | StringDB_locus tags | Gene description                                                        | Log <sub>2</sub> FoldChange <sup>a</sup> | P value | P <sub>adj</sub> <sup>b</sup> | GO terms                                                                                                                                                                                                                                                              |
|-------------------|---------------------|-------------------------------------------------------------------------|------------------------------------------|---------|-------------------------------|-----------------------------------------------------------------------------------------------------------------------------------------------------------------------------------------------------------------------------------------------------------------------|
| HSIVP1_RS01605    | menD                | 2-succinyl-5-enolpyruvyl-6-hydroxy-3-cyclohexene-1-carboxylate synthase | 1.23                                     | 0.04    | 0.14                          | 2-succinyl-5-enolpyruvyl-6-hydroxy-3-cyclohexene-1-carboxylic-acid synthase activity [GO:0070204]; magnesium ion binding [GO:0000287]; manganese ion binding [GO:0030145]; thiamine pyrophosphate binding [GO:0030976]; menaquinone biosynthetic process [GO:0009234] |
| HSIVP1_RS02920    | Vpar_1707           | domain protein                                                          | 1.14                                     | 0.04    | 0.14                          | transition metal ion binding [GO:0046914]                                                                                                                                                                                                                             |
| HSIVP1_RS08375    | Vpar_0006           | hypothetical protein                                                    | 1.30                                     | 0.04    | 0.14                          | #N/A                                                                                                                                                                                                                                                                  |
| HSIVP1_RS07435    | hypA                | hydrogenase nickel insertion protein                                    | -1.68                                    | 0.04    | 0.14                          | nickel cation binding [GO:0016151]; zinc ion binding [GO:0008270]; cellular protein modification process [GO:0006464]; protein maturation [GO:0051604]                                                                                                                |
| HSIVP1_RS07035    | Vpar_0400           | transcriptional family                                                  | 1.09                                     | 0.04    | 0.14                          | #N/A                                                                                                                                                                                                                                                                  |
| HSIVP1_RS06190    | Vpar_1264           | xanthine permease                                                       | -1.80                                    | 0.04    | 0.14                          | integral component of membrane [GO:0016021]; transmembrane transporter activity [GO:0022857]                                                                                                                                                                          |
| HSIVP1_RS06110    | Vpar_1272           | diaminopropionate ammonia-lyase                                         | -1.08                                    | 0.04    | 0.14                          | diaminopropionate ammonia-lyase activity [GO:0008838]; L-threonine ammonia-lyase activity [GO:0004794]; pyridoxal phosphate binding [GO:0030170]                                                                                                                      |
| HSIVP1_RS00425    | Vpar_0154           | amidase                                                                 | -1.35                                    | 0.04    | 0.14                          | isochorismatase activity [GO:0008908]                                                                                                                                                                                                                                 |
| HSIVP1_RS06445    | Vpar_1386           | family domain protein                                                   | 3.93                                     | 0.04    | 0.14                          | integral component of membrane [GO:0016021]                                                                                                                                                                                                                           |
| HSIVP1_RS03605    | --                  | transcription termination factor                                        | -2.60                                    | 0.04    | 0.14                          | cytoplasm [GO:0005737]; DNA-binding transcription factor activity [GO:0003700]; RNA binding [GO:0003723]; DNA-templated transcription, termination [GO:0006353]; transcription antitermination [GO:0031564]                                                           |
| HSIVP1_RS08930    | --                  | two-component sensor histidine kinase                                   | 1.17                                     | 0.04    | 0.14                          | integral component of membrane [GO:0016021]; intracellular [GO:0005622]; ATP binding [GO:0005524]; phosphorelay sensor kinase activity [GO:0000155]                                                                                                                   |
| HSIVP1_RS02595    | Vpar_0400           | transcriptional family                                                  | 1.16                                     | 0.04    | 0.14                          | DNA binding [GO:0003677]; DNA-binding transcription factor activity [GO:0003700]; transcription, DNA-templated [GO:0006351]                                                                                                                                           |
| HSIVP1_RS04765    | Vpar_1011           | rna polymerase sigma-h factor                                           | 1.25                                     | 0.04    | 0.15                          | DNA binding [GO:0003677]; DNA-binding transcription factor activity [GO:0003700]; sigma factor activity [GO:0016987]; DNA-templated transcription, initiation [GO:0006352]                                                                                            |
| HSIVP1_RS00695    | Vpar_1072           | membrane protein                                                        | -1.70                                    | 0.04    | 0.15                          | integral component of membrane [GO:0016021]                                                                                                                                                                                                                           |
| HSIVP1_RS02325    | serS                | serine--trna ligase                                                     | 1.11                                     | 0.04    | 0.15                          | cytoplasm [GO:0005737]; ATP binding [GO:0005524]; serine-tRNA ligase activity [GO:0004828]; selenocysteine biosynthetic process [GO:0016260]; selenocysteinyl-tRNA(Sec) biosynthetic process [GO:0097056]; seryl-tRNA aminoacylation [GO:0006434]                     |
| HSIVP1_RS02930    | Vpar_0006           | hypothetical protein                                                    | 1.21                                     | 0.04    | 0.15                          | 0                                                                                                                                                                                                                                                                     |
| HSIVP1_RS08800    | rplI                | ribosomal protein I9                                                    | 1.09                                     | 0.04    | 0.15                          | ribosome [GO:0005840]; rRNA binding [GO:0019843]; structural constituent of ribosome [GO:0003735]; translation [GO:0006412]                                                                                                                                           |
| HSIVP1_RS09250    | Vpar_1730           | carboxymuconolactone decarboxylase                                      | -1.44                                    | 0.04    | 0.15                          | 4-carboxymuconolactone decarboxylase activity [GO:0047575]; peroxiredoxin activity [GO:0051920]                                                                                                                                                                       |

| GeneSymbol (NCBI) | StringDB_locus tags | Gene description                                     | Log <sub>2</sub> FoldChange <sup>a</sup> | P value | P <sub>adj</sub> <sup>b</sup> | GO terms                                                                                                                                                                                                                                                                                |
|-------------------|---------------------|------------------------------------------------------|------------------------------------------|---------|-------------------------------|-----------------------------------------------------------------------------------------------------------------------------------------------------------------------------------------------------------------------------------------------------------------------------------------|
| HSIVP1_RS00920    | --                  | Respiratory nitrate reductase alpha chain            | -1.07                                    | 0.04    | 0.15                          | nitrate reductase complex [GO:0009325]; 4 iron, 4 sulfur cluster binding [GO:0051539]; metal ion binding [GO:0046872]; molybdopterin cofactor binding [GO:0043546]; nitrate reductase activity [GO:0008940]; nitrate metabolic process [GO:0042126]                                     |
| HSIVP1_RS04915    | --                  | trna threonylcarbamoyladenosine biosynthesis protein | -1.52                                    | 0.04    | 0.15                          | peptidase activity [GO:0008233]; tRNA threonylcarbamoyladenosine modification [GO:0002949]                                                                                                                                                                                              |
| HSIVP1_RS09455    | --                  | pf14584 family protein                               | 1.12                                     | 0.04    | 0.15                          | integral component of membrane [GO:0016021]                                                                                                                                                                                                                                             |
| HSIVP1_RS02795    | Vpar_0606           | pur operon repressor                                 | 2.20                                     | 0.05    | 0.15                          | adenine phosphoribosyltransferase activity [GO:0003999]; DNA binding [GO:0003677]; negative regulation of purine nucleobase metabolic process [GO:0045982]; negative regulation of transcription, DNA-templated [GO:0045892]; nucleoside metabolic process [GO:0009116]                 |
| HSIVP1_RS04975    | --                  | cdp-diacylglycerol-serine o-phosphatidyltransferase  | 1.19                                     | 0.05    | 0.15                          | integral component of membrane [GO:0016021]; CDP-diacylglycerol-serine O-phosphatidyltransferase activity [GO:0003882]; phospholipid biosynthetic process [GO:0008654]                                                                                                                  |
| HSIVP1_RS09615    | --                  | arylsulfatase                                        | 1.09                                     | 0.05    | 0.16                          | integral component of membrane [GO:0016021]; sulfuric ester hydrolase activity [GO:0008484]                                                                                                                                                                                             |
| HSIVP1_RS02750    | Vpar_0387           | mfS transporter                                      | 1.44                                     | 0.05    | 0.16                          | integral component of membrane [GO:0016021]; transmembrane transport [GO:0055085]                                                                                                                                                                                                       |
| HSIVP1_RS09555    | gyrB                | dna gyrase subunit b                                 | -1.09                                    | 0.05    | 0.16                          | chromosome [GO:0005694]; cytoplasm [GO:0005737]; ATP binding [GO:0005524]; DNA binding [GO:0003677]; DNA topoisomerase type II (ATP-hydrolyzing) activity [GO:0003918]; metal ion binding [GO:0046872]; DNA topological change [GO:0006265]; DNA-dependent DNA replication [GO:0006261] |
| HSIVP1_RS06420    | --                  | potassium uptake system protein                      | -1.58                                    | 0.05    | 0.16                          | cation transmembrane transporter activity [GO:0008324]; potassium ion transport [GO:0006813]                                                                                                                                                                                            |
| HSIVP1_RS05600    | Vpar_1176           | o-methyltransferase                                  | 1.24                                     | 0.05    | 0.16                          | O-methyltransferase activity [GO:0008171]                                                                                                                                                                                                                                               |
| HSIVP1_RS02395    | --                  | outer membrane omp85 family                          | -1.07                                    | 0.05    | 0.16                          | outer membrane [GO:0019867]                                                                                                                                                                                                                                                             |
| HSIVP1_RS03915    | --                  | pf04025 domain protein                               | 1.92                                     | 0.05    | 0.16                          | 0                                                                                                                                                                                                                                                                                       |
| HSIVP1_RS05845    | Vpar_1072           | membrane protein                                     | -1.37                                    | 0.05    | 0.16                          | #N/A                                                                                                                                                                                                                                                                                    |
| HSIVP1_RS05340    | --                  | glutamyl-queuosine trna synthetase                   | -2.32                                    | 0.05    | 0.16                          | cytoplasm [GO:0005737]; aminoacyl-tRNA ligase activity [GO:0004812]; ATP binding [GO:0005524]; tRNA aminoacylation for protein translation [GO:0006418]                                                                                                                                 |

<sup>a</sup>Log<sub>2</sub> Fold Change in Coaggregates versus monocultures. Genes down-regulated in coaggregates have negative numbers.

<sup>b</sup>Blue shading indicates genes where  $P_{adj} > 0.05$  and  $P < 0.05$



**Table S3.** Genes regulated in *S. gordonii* following coaggregation with *V. parvula* ( $P < 0.05$ ).

| GeneSymbol (NCBI) | StringDB_locus tags | Gene Description                               | Log <sub>2</sub> FoldChange <sup>a</sup> | P value | P <sub>adj</sub> <sup>b</sup> | GO terms                                                                                                                                                                                                                                                                                                             |
|-------------------|---------------------|------------------------------------------------|------------------------------------------|---------|-------------------------------|----------------------------------------------------------------------------------------------------------------------------------------------------------------------------------------------------------------------------------------------------------------------------------------------------------------------|
| SGO_RS01315       | SGO_0267            | transporter                                    | -1.13                                    | 0.00    | 0.85                          | integral component of membrane [GO:0016021]; amino acid transmembrane transporter activity [GO:0015171]                                                                                                                                                                                                              |
| SGO_RS06225       | SGO_RS06225         | thioredoxin signature protein                  | 1.80                                     | 0.00    | 0.85                          | -                                                                                                                                                                                                                                                                                                                    |
| SGO_RS06800       | sufB-2 SGO_1387     | Fe-S cluster assembly protein                  | -1.08                                    | 0.00    | 0.85                          | iron-sulfur cluster assembly [GO:0016226]                                                                                                                                                                                                                                                                            |
| SGO_RS03505       | dgkA SGO_0712       | diacylglycerol kinase                          | -1.44                                    | 0.00    | 0.85                          | integral component of membrane [GO:0016021]; diacylglycerol kinase activity [GO:0004143]; phospholipid biosynthetic process [GO:0008654]                                                                                                                                                                             |
| SGO_RS00210       | SGO_0044            | PTS system sorbose subfamily IIB component     | -1.05                                    | 0.00    | 0.85                          | cytoplasm [GO:0005737]; D-glucosamine PTS permease activity [GO:0103111]; protein-N(Pi)-phosphohistidine-sugar phosphotransferase activity [GO:0008982]; phosphoenolpyruvate-dependent sugar phosphotransferase system [GO:0009401]                                                                                  |
| SGO_RS09100       | SGO_1858            | sucrose-6-phosphate hydrolase                  | -1.33                                    | 0.00    | 0.85                          | cytoplasm [GO:0005737]; sucrose alpha-glucosidase activity [GO:0004575]; carbohydrate metabolic process [GO:0005975]                                                                                                                                                                                                 |
| SGO_RS03500       | ybeY SGO_0711       | metalloprotease                                | -1.08                                    | 0.00    | 0.85                          | cytoplasm [GO:0005737]; endonuclease activity [GO:0004519]; metal ion binding [GO:0046872]; metalloendopeptidase activity [GO:0004222]; rRNA processing [GO:0006364]                                                                                                                                                 |
| SGO_RS09095       | SGO_1857            | PTS beta-glucoside transporter subunit EIIBC A | -1.05                                    | 0.00    | 0.85                          | integral component of membrane [GO:0016021]; plasma membrane [GO:0005886]; D-glucosamine PTS permease activity [GO:0103111]; kinase activity [GO:0016301]; protein-N(Pi)-phosphohistidine-sugar phosphotransferase activity [GO:0008982]; phosphoenolpyruvate-dependent sugar phosphotransferase system [GO:0009401] |
| SGO_RS01065       | mntH SGO_0217       | manganese transporter                          | -1.07                                    | 0.00    | 0.85                          | integral component of membrane [GO:0016021]; plasma membrane [GO:0005886]; metal ion binding [GO:0046872]; metal ion transmembrane transporter activity [GO:0046873]; symporter activity [GO:0015293]                                                                                                                |
| SGO_RS02580       | SGO_0522            | acylphosphatase                                | -1.15                                    | 0.00    | 0.85                          | acylphosphatase activity [GO:0003998]                                                                                                                                                                                                                                                                                |
| SGO_RS03395       | SGO_0689            | pf08796 family protein                         | 1.60                                     | 0.00    | 0.85                          | -                                                                                                                                                                                                                                                                                                                    |
| SGO_RS01450       | SGO_RS01450         | transcriptional regulator                      | 1.42                                     | 0.01    | 0.85                          | -                                                                                                                                                                                                                                                                                                                    |
| SGO_RS05750       | SGO_RS05750         | thiamine biosynthesis protein                  | -1.03                                    | 0.01    | 0.85                          | -                                                                                                                                                                                                                                                                                                                    |
| SGO_RS01930       | SGO_0387            | dihydrodipicolinate reductase                  | 1.54                                     | 0.01    | 0.96                          | 4-hydroxy-tetrahydrodipicolinate reductase [GO:0008839]; lysine biosynthetic process via diaminopimelate [GO:0009089]                                                                                                                                                                                                |
| SGO_RS02125       | SGO_0427            | universal stress protein                       | -1.04                                    | 0.01    | 0.96                          | cytoplasm [GO:0005737]; response to stress [GO:0006950]                                                                                                                                                                                                                                                              |
| SGO_RS10165       | SGO_2076            | integrase                                      | -0.98                                    | 0.01    | 1.00                          | DNA binding [GO:0003677]; DNA integration [GO:0015074]; DNA recombination [GO:0006310]                                                                                                                                                                                                                               |
| SGO_RS01070       | SGO_RS01070         | partial                                        | -0.96                                    | 0.01    | 1.00                          | -                                                                                                                                                                                                                                                                                                                    |

| GeneSymbol (NCBI) | StringDB_locus tags | Gene Description                                   | Log <sub>2</sub> FoldChange <sup>a</sup> | P value | P <sub>adj</sub> <sup>b</sup> | GO terms                                                                                                                                                                                                                                                 |
|-------------------|---------------------|----------------------------------------------------|------------------------------------------|---------|-------------------------------|----------------------------------------------------------------------------------------------------------------------------------------------------------------------------------------------------------------------------------------------------------|
| SGO_RS01740       | SGO_0352            | sugar ABC transporter ATP-binding protein          | -0.91                                    | 0.01    | 1.00                          | ATP-binding cassette (ABC) transporter complex [GO:0043190]; ATP binding [GO:0005524]; ATPase activity [GO:0016887]; transporter activity [GO:0005215]; transport [GO:0006810]                                                                           |
| SGO_RS07170       | SGO_1461            | domain protein                                     | 1.48                                     | 0.01    | 1.00                          | integral component of membrane [GO:0016021]                                                                                                                                                                                                              |
| SGO_RS00365       | SGO_0075            | hypothetical protein                               | 1.20                                     | 0.01    | 1.00                          | integral component of membrane [GO:0016021]                                                                                                                                                                                                              |
| SGO_RS02770       | SGO_0561            | toxin                                              | -0.96                                    | 0.01    | 1.00                          | -                                                                                                                                                                                                                                                        |
| SGO_RS00215       | SGO_0045            | PTS fructose transporter subunit IIC               | -0.91                                    | 0.01    | 1.00                          | integral component of membrane [GO:0016021]; D-glucosamine PTS permease activity [GO:0103111]; protein-N(Pi)-phosphohistidine-sugar phosphotransferase activity [GO:0008982]; phosphoenolpyruvate-dependent sugar phosphotransferase system [GO:0009401] |
| SGO_RS04230       | SGO_0862            | hypothetical protein                               | 1.55                                     | 0.02    | 1.00                          | integral component of membrane [GO:0016021]                                                                                                                                                                                                              |
| SGO_RS03570       | SGO_0726            | family transcriptional regulator                   | -1.19                                    | 0.02    | 1.00                          | DNA binding [GO:0003677]; regulation of transcription, DNA-templated [GO:0006355]; transcription, DNA-templated [GO:0006351]                                                                                                                             |
| SGO_RS03555       | tehB SGO_0722       | tellurite resistance protein                       | 1.34                                     | 0.02    | 1.00                          | cytoplasm [GO:0005737]; S-adenosylmethionine-dependent methyltransferase activity [GO:0008757]; response to tellurium ion [GO:0046690]                                                                                                                   |
| SGO_RS02790       | sgc SGO_0566        | serine protease                                    | 0.88                                     | 0.02    | 1.00                          | cell wall [GO:0005618]; extracellular region [GO:0005576]; membrane [GO:0016020]; serine-type endopeptidase activity [GO:0004252]; pathogenesis [GO:0009405]                                                                                             |
| SGO_RS03370       | SGO_0684            | pf08860 domain protein                             | -0.86                                    | 0.02    | 1.00                          | -                                                                                                                                                                                                                                                        |
| SGO_RS04845       | SGO_0988            | transcriptional regulator                          | 0.93                                     | 0.02    | 1.00                          | intracellular [GO:0005622]; DNA binding [GO:0003677]; DNA binding transcription factor activity [GO:0003700]; transcription, DNA-templated [GO:0006351]                                                                                                  |
| SGO_RS10185       | SGO_2080            | xre family transcriptional regulator               | -0.96                                    | 0.02    | 1.00                          | sequence-specific DNA binding [GO:0043565]                                                                                                                                                                                                               |
| SGO_RS02590       | SGO_0524            | HD domain protein                                  | -0.83                                    | 0.02    | 1.00                          | -                                                                                                                                                                                                                                                        |
| SGO_RS01075       | SGO_RS01075         | transposase                                        | -0.87                                    | 0.02    | 1.00                          | -                                                                                                                                                                                                                                                        |
| SGO_RS00985       | SGO_0201            | 3-5 exonuclease                                    | 0.86                                     | 0.02    | 1.00                          | -                                                                                                                                                                                                                                                        |
| SGO_RS09785       | SGO_RS09785         | membrane protein                                   | -0.82                                    | 0.02    | 1.00                          | -                                                                                                                                                                                                                                                        |
| SGO_RS07880       | SGO_RS07880         | transcriptional family                             | -0.86                                    | 0.02    | 1.00                          | -                                                                                                                                                                                                                                                        |
| SGO_RS10300       | abpA SGO_2105       | amylase-binding protein                            | -0.82                                    | 0.02    | 1.00                          | -                                                                                                                                                                                                                                                        |
| SGO_RS08385       | amiD SGO_1710       | peptide abc transporter permease                   | 0.90                                     | 0.02    | 1.00                          | integral component of membrane [GO:0016021]; plasma membrane [GO:0005886]; transport [GO:0006810]                                                                                                                                                        |
| SGO_RS01335       | SGO_0271            | Zn-dependent protease                              | 1.00                                     | 0.02    | 1.00                          | -                                                                                                                                                                                                                                                        |
| SGO_RS06260       | mscL SGO_1275       | large conductance mechanosensitive channel protein | 1.01                                     | 0.02    | 1.00                          | integral component of plasma membrane [GO:0005887]; mechanosensitive ion channel activity [GO:0008381]                                                                                                                                                   |
| SGO_RS04880       | SGO_0996            | short-chain dehydrogenase                          | -0.81                                    | 0.03    | 1.00                          | oxidoreductase activity [GO:0016491]                                                                                                                                                                                                                     |

| GeneSymbol (NCBI) | StringDB_locus tags | Gene Description                         | Log <sub>2</sub> FoldChange <sup>a</sup> | P value | P <sub>adj</sub> <sup>b</sup> | GO terms                                                                                                                                                                                                                                                                                                                                |
|-------------------|---------------------|------------------------------------------|------------------------------------------|---------|-------------------------------|-----------------------------------------------------------------------------------------------------------------------------------------------------------------------------------------------------------------------------------------------------------------------------------------------------------------------------------------|
| SGO_RS07435       | lacC SGO_1517       | tagatose-6-phosphate kinase              | -0.79                                    | 0.03    | 1.00                          | ATP binding [GO:0005524]; tagatose-6-phosphate kinase activity [GO:0009024]; D-tagatose 6-phosphate catabolic process [GO:2001059]; lactose catabolic process via tagatose-6-phosphate [GO:0019512]                                                                                                                                     |
| SGO_RS02020       | SGO_0405            | beta-n-acetylhexosaminidase              | 0.83                                     | 0.03    | 1.00                          | extracellular region [GO:0005576]; integral component of membrane [GO:0016021]; beta-N-acetylhexosaminidase activity [GO:0004563]; N-acetyl-beta-D-galactosaminidase activity [GO:0102148]; carbohydrate metabolic process [GO:0005975]                                                                                                 |
| SGO_RS03085       | recX SGO_0626       | recombination regulator                  | -0.91                                    | 0.03    | 1.00                          | cytoplasm [GO:0005737]; regulation of DNA repair [GO:0006282]                                                                                                                                                                                                                                                                           |
| SGO_RS03795       | ccpA SGO_0773       | catabolite control protein A             | -0.81                                    | 0.03    | 1.00                          | protein-DNA complex [GO:0032993]; bacterial-type RNA polymerase transcriptional repressor activity, sequence-specific DNA binding [GO:0001217]; transcription regulatory region sequence-specific DNA binding [GO:0000976]; negative regulation of transcription, DNA-templated [GO:0045892]; transcription, DNA-templated [GO:0006351] |
| SGO_RS00770       | SGO_0156            | hypothetical protein                     | 0.97                                     | 0.03    | 1.00                          | integral component of membrane [GO:0016021]                                                                                                                                                                                                                                                                                             |
| SGO_RS03680       | SGO_0749            | glutathione-disulfide reductase          | 0.81                                     | 0.03    | 1.00                          | cell [GO:0005623]; electron transfer activity [GO:0009055]; flavin adenine dinucleotide binding [GO:0050660]; glutathione-disulfide reductase activity [GO:0004362]; NADP binding [GO:0050661]; cell redox homeostasis [GO:0045454]; glutathione metabolic process [GO:0006749]                                                         |
| SGO_RS05225       | SGO_RS05225         | hypothetical protein                     | 1.80                                     | 0.03    | 1.00                          | -                                                                                                                                                                                                                                                                                                                                       |
| SGO_RS05250       | SGO_1069            | aminopeptidase N                         | 0.97                                     | 0.03    | 1.00                          | aminopeptidase activity [GO:0004177]; metallopeptidase activity [GO:0008237]; zinc ion binding [GO:0008270]                                                                                                                                                                                                                             |
| SGO_RS08605       | scrK SGO_1755       | fructokinase                             | -0.80                                    | 0.03    | 1.00                          | fructokinase activity [GO:0008865]                                                                                                                                                                                                                                                                                                      |
| SGO_RS07610       | glgC SGO_1553       | glucose-1-phosphate adenyltransferase    | -0.76                                    | 0.03    | 1.00                          | ATP binding [GO:0005524]; glucose-1-phosphate adenyltransferase activity [GO:0008878]; glycogen biosynthetic process [GO:0005978]                                                                                                                                                                                                       |
| SGO_RS05055       | SGO_1030            | 30S ribosomal protein S15                | -0.77                                    | 0.04    | 1.00                          | integral component of membrane [GO:0016021]                                                                                                                                                                                                                                                                                             |
| SGO_RS05585       | SGO_RS05585         | esterase                                 | 1.91                                     | 0.04    | 1.00                          | -                                                                                                                                                                                                                                                                                                                                       |
| SGO_RS03935       | thrB SGO_0802       | homoserine kinase                        | 0.91                                     | 0.04    | 1.00                          | cytoplasm [GO:0005737]; ATP binding [GO:0005524]; homoserine kinase activity [GO:0004413]; threonine biosynthetic process [GO:0009088]                                                                                                                                                                                                  |
| SGO_RS03460       | SGO_0703            | Fur family transcriptional regulator     | -0.75                                    | 0.04    | 1.00                          | DNA binding [GO:0003677]; DNA binding transcription factor activity [GO:0003700]                                                                                                                                                                                                                                                        |
| SGO_RS08800       | pflC SGO_1794       | pyruvate formate-lyase-activating enzyme | -0.73                                    | 0.04    | 1.00                          | 4 iron, 4 sulfur cluster binding [GO:0051539]; [formate-C-acetyltransferase]-activating enzyme activity [GO:0043365]; transferase activity [GO:0016740]                                                                                                                                                                                 |

| GeneSymbol (NCBI) | StringDB_locus tags | Gene Description                            | Log <sub>2</sub> FoldChange <sup>a</sup> | P value | P <sub>adj</sub> <sup>b</sup> | GO terms                                                                                                                                                                                                                                                 |
|-------------------|---------------------|---------------------------------------------|------------------------------------------|---------|-------------------------------|----------------------------------------------------------------------------------------------------------------------------------------------------------------------------------------------------------------------------------------------------------|
| SGO_RS08395       | sarA hppA SGO_1712  | peptide ABC transporter atp-binding protein | 0.78                                     | 0.04    | 1.00                          | ATP-binding cassette (ABC) transporter complex [GO:0043190]; protein transport [GO:0015031]; transmembrane transport [GO:0055085]                                                                                                                        |
| SGO_RS00220       | SGO_0046            | PTS fructose transporter subunit IID        | -0.89                                    | 0.04    | 1.00                          | integral component of membrane [GO:0016021]; D-glucosamine PTS permease activity [GO:0103111]; protein-N(Pi)-phosphohistidine-sugar phosphotransferase activity [GO:0008982]; phosphoenolpyruvate-dependent sugar phosphotransferase system [GO:0009401] |
| SGO_RS06525       | SGO_1330            | ABC transporter ATP-binding protein         | -0.79                                    | 0.04    | 1.00                          | integral component of membrane [GO:0016021]; ATP binding [GO:0005524]; ATPase activity, coupled to transmembrane movement of substances [GO:0042626]                                                                                                     |
| SGO_RS01125       | SGO_0228            | family transcriptional regulator            | 0.91                                     | 0.04    | 1.00                          | DNA binding [GO:0003677]; regulation of transcription, DNA-templated [GO:0006355]                                                                                                                                                                        |
| SGO_RS03940       | SGO_0803            | uncharacterised protein                     | 0.82                                     | 0.04    | 1.00                          | integral component of membrane [GO:0016021]                                                                                                                                                                                                              |
| SGO_RS09155       | SGO_1869            | hypothetical protein                        | 0.95                                     | 0.04    | 1.00                          | integral component of membrane [GO:0016021]                                                                                                                                                                                                              |
| SGO_RS01505       | SGO_0305            | lantibiotic abc transporter permease        | -0.89                                    | 0.04    | 1.00                          | integral component of membrane [GO:0016021]; transport [GO:0006810]                                                                                                                                                                                      |
| SGO_RS09195       | SGO_RS09195         | family transcriptional regulator            | -1.13                                    | 0.04    | 1.00                          | -                                                                                                                                                                                                                                                        |
| SGO_RS04645       | deaD SGO_0949       | RNA helicase                                | 0.75                                     | 0.05    | 1.00                          | ATP binding [GO:0005524]; helicase activity [GO:0004386]; nucleic acid binding [GO:0003676]                                                                                                                                                              |
| SGO_RS06050       | ldh SGO_1232        | l-lactate dehydrogenase 1                   | -0.71                                    | 0.05    | 1.00                          | cytoplasm [GO:0005737]; L-lactate dehydrogenase activity [GO:0004459]; carbohydrate metabolic process [GO:0005975]; carboxylic acid metabolic process [GO:0019752]                                                                                       |
| SGO_RS10595       | SGO_RS10595         | truncated hypothetical protein              | 0.70                                     | 0.05    | 1.00                          | -                                                                                                                                                                                                                                                        |
| SGO_RS04160       | rpmE rpmE2 SGO_0848 | ribosomal protein l31                       | 0.81                                     | 0.05    | 1.00                          | ribosome [GO:0005840]; structural constituent of ribosome [GO:0003735]; translation [GO:0006412]                                                                                                                                                         |
| SGO_RS01500       | SGO_0304            | lantibiotic ABC transporter permease        | -0.85                                    | 0.05    | 1.00                          | integral component of membrane [GO:0016021]; transport [GO:0006810]                                                                                                                                                                                      |
| SGO_RS02775       | SGO_0562            | DNA-binding protein                         | -0.73                                    | 0.05    | 1.00                          | sequence-specific DNA binding [GO:0043565]                                                                                                                                                                                                               |
| SGO_RS08120       | SGO_1657            | -                                           | -0.81                                    | 0.05    | 1.00                          | integral component of membrane [GO:0016021]                                                                                                                                                                                                              |

<sup>a</sup>Log<sub>2</sub> Fold Change in Coaggregates versus monocultures. Genes down-regulated in coaggregates have negative numbers.

<sup>b</sup>Blue shading indicates genes where  $P_{adj} > 0.05$  and  $P < 0.05$ . There were no genes that met the criterion  $P_{adj} < 0.05$ .

**Table S4.** Genes in the enriched GO category 'oxidoreductase' that were regulated in *V. parvula* following coaggregation with *S. gordonii* ( $P_{adj} < 0.05$ ).

| Oxidoreductase | Gene/Vpar ID | Gene description                                              | Log <sub>2</sub> FoldChange <sup>a</sup> | P value | P <sub>adj</sub> |
|----------------|--------------|---------------------------------------------------------------|------------------------------------------|---------|------------------|
| HSIVP1_RS00195 | Vpar_0077    | FAD-dependent oxidoreductase                                  | -6.56                                    | 0.00    | 0.00             |
| HSIVP1_RS00930 | Vpar_0224    | nitrate reductase molybdenum cofactor assembly chaperone      | -1.67                                    | 0.00    | 0.01             |
| HSIVP1_RS01385 | --           | NADH-dependent oxidoreductase                                 | -3.84                                    | 0.00    | 0.00             |
| HSIVP1_RS01410 | Vpar_0329    | diaminopimelate dehydrogenase                                 | -2.62                                    | 0.00    | 0.00             |
| HSIVP1_RS01455 | --           | conserved domain protein                                      | 1.64                                     | 0.00    | 0.02             |
| HSIVP1_RS01945 | Vpar_1595    | malate dehydrogenase                                          | -2.20                                    | 0.00    | 0.00             |
| HSIVP1_RS02075 | Vpar_0574    | dihydrolipoamide dehydrogenase                                | -4.54                                    | 0.00    | 0.00             |
| HSIVP1_RS02130 | Vpar_0478    | cytochrome ubiquinol oxidase subunit i                        | -2.56                                    | 0.00    | 0.00             |
| HSIVP1_RS02135 | Vpar_0478    | cytochrome d ubiquinol subunit ii                             | -4.59                                    | 0.00    | 0.00             |
| HSIVP1_RS02585 | --           | dihydropicolinate synthase                                    | 1.65                                     | 0.00    | 0.03             |
| HSIVP1_RS03250 | Vpar_0690    | 2-nitropropane dioxygenase                                    | -1.85                                    | 0.00    | 0.00             |
| HSIVP1_RS03260 | Vpar_0702    | 3-oxoacyl-[acyl-carrier-protein] synthase III ( <i>fabH</i> ) | -2.05                                    | 0.00    | 0.00             |
| HSIVP1_RS03405 | Vpar_0740    | antibiotic biosynthesis monooxygenase                         | -1.98                                    | 0.00    | 0.01             |
| HSIVP1_RS03885 | Vpar_0834    | glycerol-3-phosphate dehydrogenase ( <i>gpsA</i> )            | 2.88                                     | 0.00    | 0.00             |
| HSIVP1_RS04480 | Vpar_0955    | pyruvate dehydrogenase                                        | -2.51                                    | 0.00    | 0.00             |
| HSIVP1_RS05330 | Vpar_1121    | thioredoxin                                                   | -1.44                                    | 0.01    | 0.05             |
| HSIVP1_RS05430 | Vpar_1143    | precorrin-4 c -methyltransferase                              | -3.14                                    | 0.00    | 0.00             |
| HSIVP1_RS05660 | --           | uptake hydrogenase small subunit                              | -2.23                                    | 0.00    | 0.00             |
| HSIVP1_RS05665 | Vpar_1121    | thioredoxin                                                   | -4.34                                    | 0.00    | 0.00             |
| HSIVP1_RS05740 | Vpar_0704    | radical SAM protein ( <i>queE</i> )                           | 2.33                                     | 0.00    | 0.00             |
| HSIVP1_RS05770 | --           | coproporphyrinogen dehydrogenase                              | -1.58                                    | 0.00    | 0.02             |
| HSIVP1_RS06245 | Vpar_1301    | GMP reductase ( <i>guaC</i> )                                 | -2.23                                    | 0.00    | 0.02             |
| HSIVP1_RS06715 | Vpar_1382    | aldehyde dehydrogenase                                        | -2.91                                    | 0.00    | 0.00             |
| HSIVP1_RS06725 | Vpar_1384    | dihydrofolate reductase                                       | -3.16                                    | 0.01    | 0.03             |
| HSIVP1_RS06885 | Vpar_1424    | uroporphyrinogen-iii c-methyltransferase                      | -5.40                                    | 0.00    | 0.00             |
| HSIVP1_RS06910 | Vpar_1429    | pyrroline-5-carboxylate reductase ( <i>proC</i> )             | -2.20                                    | 0.00    | 0.01             |

|                |           |                                                                    |        |      |      |
|----------------|-----------|--------------------------------------------------------------------|--------|------|------|
| HSIVP1_RS07105 | Vpar_1460 | 2-oxoacid ferredoxin oxidoreductase subunit beta                   | -2.02  | 0.00 | 0.00 |
| HSIVP1_RS07610 | Vpar_1550 | glutamate dehydrogenase                                            | -5.72  | 0.00 | 0.00 |
| HSIVP1_RS07820 | Vpar_1594 | molybdopterin oxidoreductase                                       | -3.76  | 0.00 | 0.00 |
| HSIVP1_RS07895 | Vpar_1606 | ribonucleoside-diphosphate reductase beta subunit                  | -3.95  | 0.00 | 0.00 |
| HSIVP1_RS08035 | Vpar_1637 | glutamate synthase                                                 | -4.92  | 0.00 | 0.00 |
| HSIVP1_RS08910 | Vpar_1703 | heterodisulfide reductase subunit b                                | -9.71  | 0.00 | 0.00 |
| HSIVP1_RS08915 | Vpar_1704 | succinate dehydrogenase and fumarate reductase iron-sulfur protein | -3.50  | 0.00 | 0.02 |
| HSIVP1_RS08955 | Vpar_0690 | dioxygenase                                                        | -3.73  | 0.00 | 0.00 |
| HSIVP1_RS08995 | --        | glutamate synthase homotetrameric                                  | -2.86  | 0.00 | 0.00 |
| HSIVP1_RS09010 | Vpar_1722 | superoxide dismutase                                               | -11.29 | 0.00 | 0.00 |
| HSIVP1_RS09230 | Vpar_1772 | lactaldehyde reductase                                             | -4.59  | 0.00 | 0.00 |
| HSIVP1_RS09425 | Vpar_0321 | nitroreductase                                                     | -6.78  | 0.00 | 0.00 |
| HSIVP1_RS09580 | --        | membrane pf01595 family                                            | -1.81  | 0.00 | 0.02 |

<sup>a</sup>Log2 Fold Change in Coaggregates versus monocultures. Genes down-regulated in coaggregates have negative numbers.

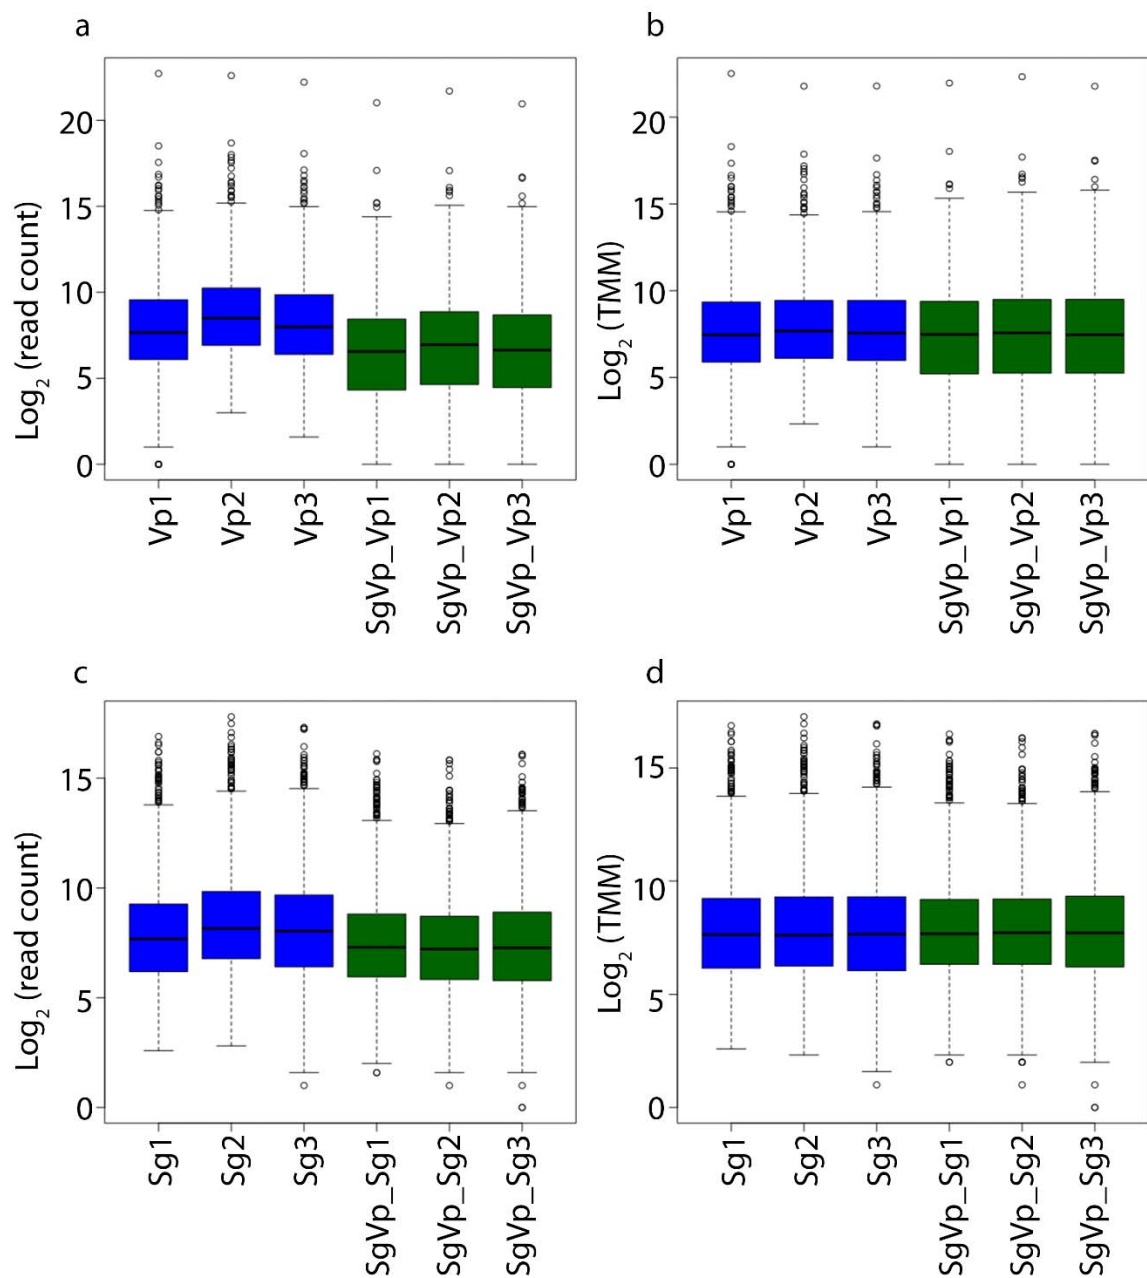

**Figure S1. Box plots showing transcript abundance before and after normalization.** Gene expression levels of *V. parvula* (a,b) or *S. gordonii* (c,d) genes in coaggregate or monoculture samples are shown before (a,c) or after (b,d) TMM normalization. Median counts are represented as thick black lines, boxes show interquartile ranges and whiskers indicate two SDs from the median. Outliers are indicated by 'o' symbols. In the box plot display, a box is formed with sides at the 25th and 75th percentiles of distribution. A line is also drawn within the box at the level of median. Whiskers are also drawn extending beyond each end of the box with points beyond the whiskers typically indicating outliers.

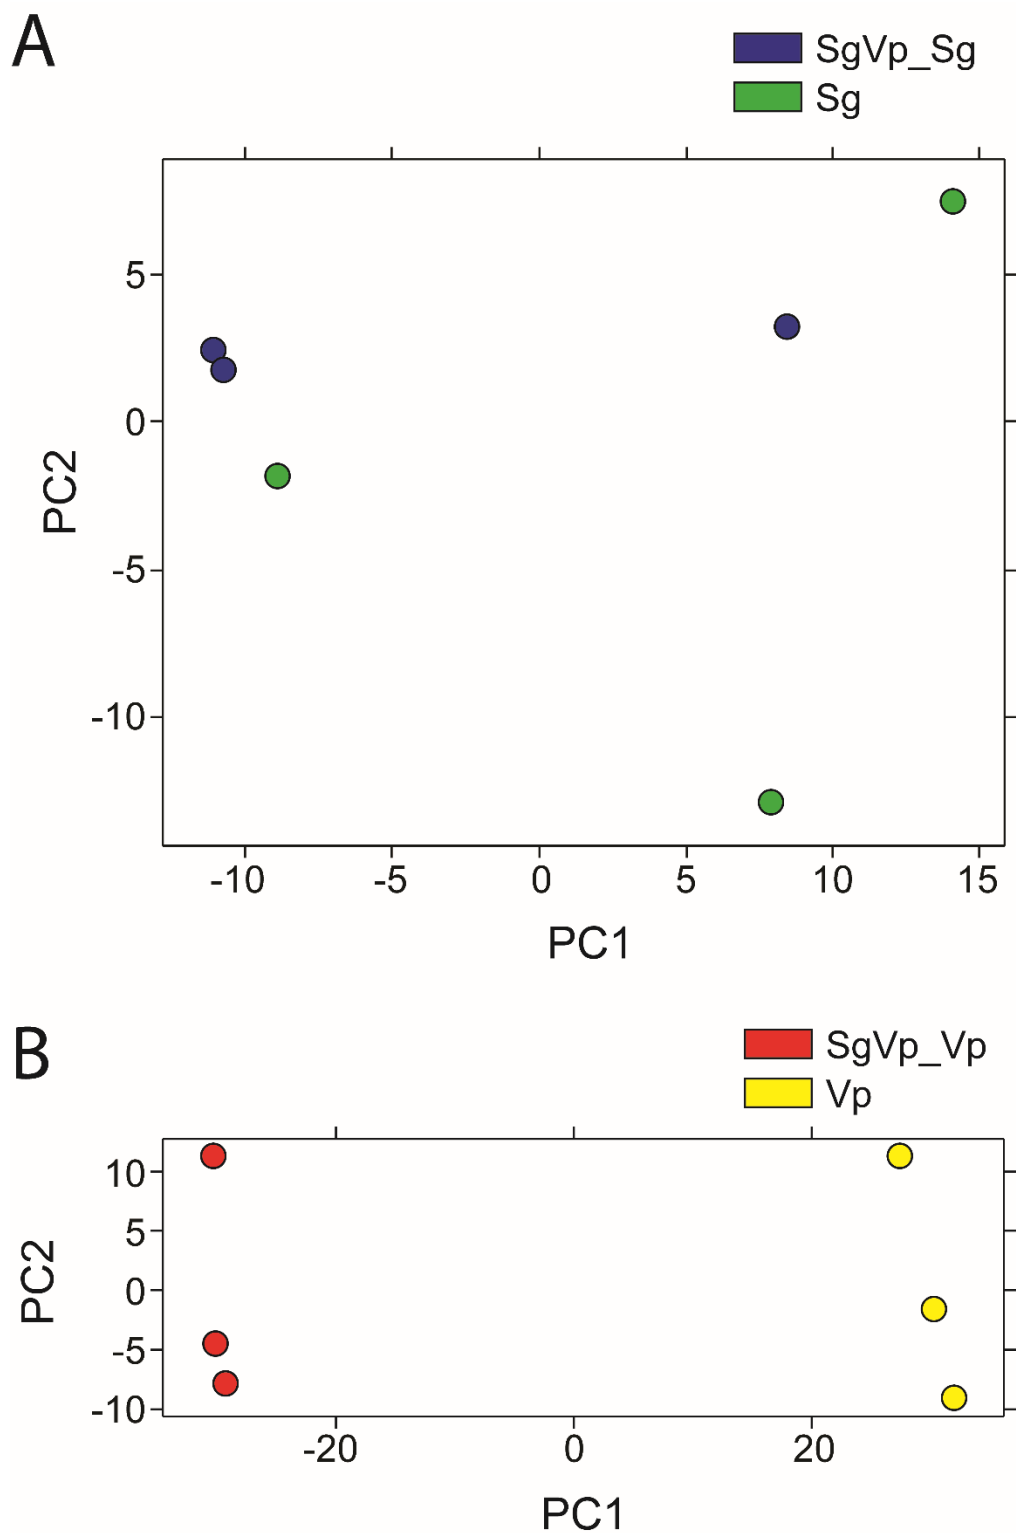

**Figure S2. Principal component analysis of biological repeats for monoculture and coaggregation samples.** (A) Analysis of *S. gordonii* monoculture samples (Sg) and *S. gordonii* transcripts in coaggregation samples (SgVp\_Sg). There was extensive variation between the monoculture samples in particular. (B) *V. parvula* monoculture samples (Vp) clustered separately from *V. parvula* transcripts in coaggregation samples (SgVp\_Vp).



BIOSYNTHESIS OF AMINO ACIDS

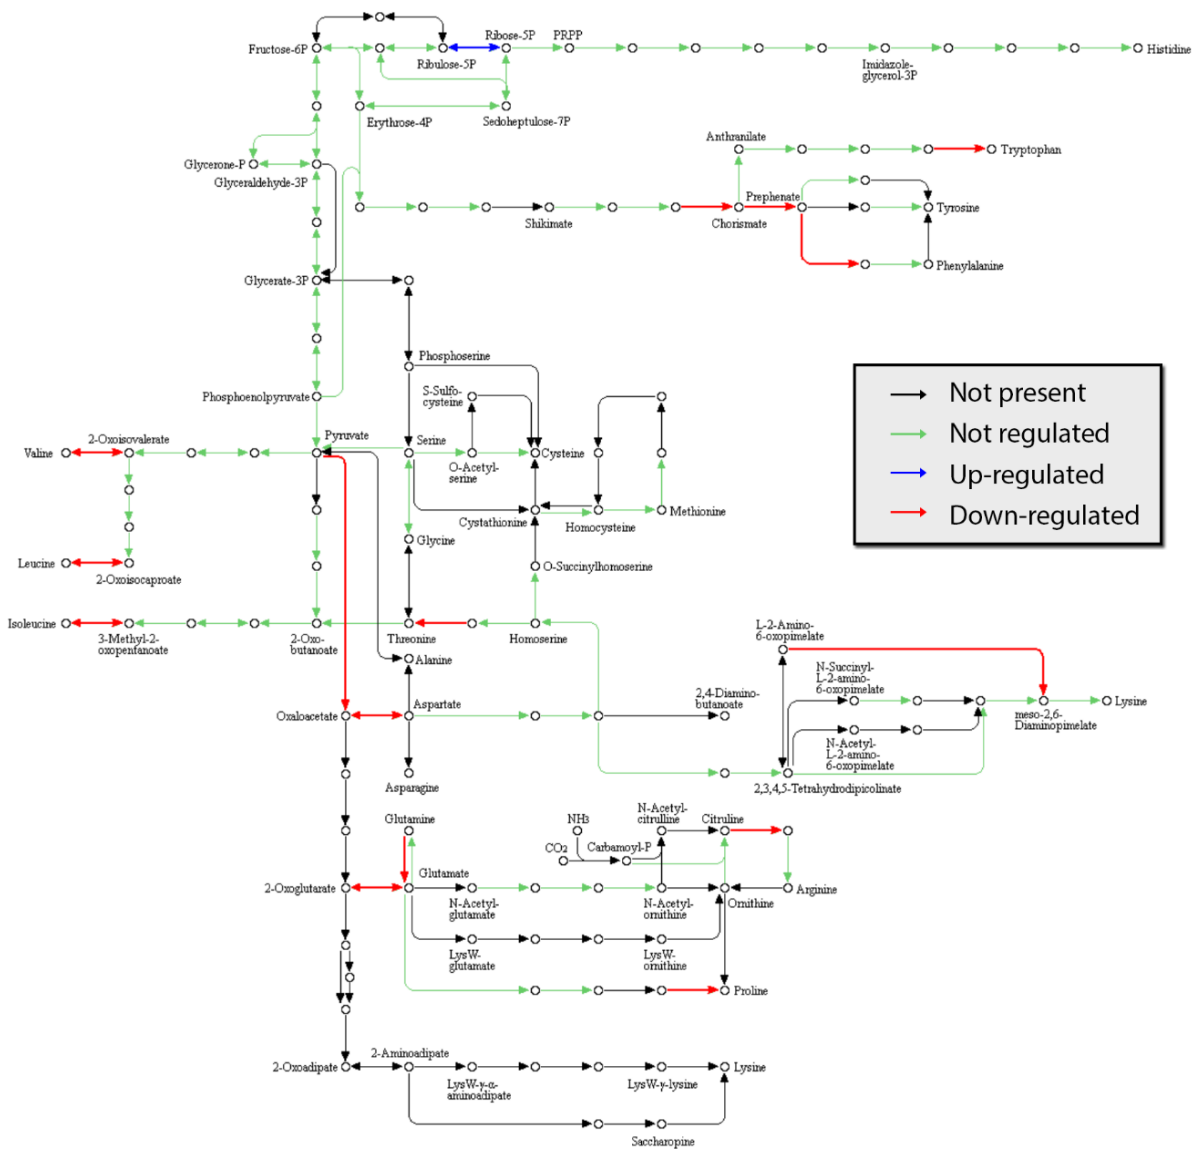

**Figure S3. Overview of the KEGG pathway ‘Biosynthesis of amino acids’, showing genes that were up-regulated or down-regulated in *V. parvula* following coaggregation with *S. gordonii*. A single up-regulated gene is indicated by a blue arrow. Multiple genes encoding steps in biosynthesis of several different amino acids were down-regulated following coaggregation (red arrows). The image was reproduced with permission from Kanehisa laboratories<sup>1</sup>.**

## Reference

- 1 Kanehisa, M., Furumichi, M., Tanabe, M., Sato, Y. & Morishima, K. KEGG: new perspectives on genomes, pathways, diseases and drugs. *Nucleic Acids Res.* **45**, D353-d361 (2017).
